# Supplementary material for: Plastic ingestion by harbour porpoises Phocoena phocoena in the Netherlands: Establishing a standardised method
Source: Springer Nature journal article supplement (doi:10.1007/s13280-017-1002-y), 2018-01-05
Supplement: MOESM1 [file 15655010]

Ambio

## Electronic Supplementary Material (ESM)

*This supplementary material has not been peer reviewed*

Title:

### **Plastic ingestion by harbour porpoises *Phocoena phocoena* in the Netherlands: establishing a standardized method**

Authors:

Jan A. van Franeker<sup>1</sup>, Elisa L. Bravo Rebolledo<sup>1,2</sup>, Eileen Hesse<sup>1</sup>, Lonneke L. IJsseldijk<sup>3</sup>, Susanne Kühn<sup>1</sup>, Mardik Leopold<sup>1</sup> and Lara Mielke<sup>1</sup>

Corresponding author: Jan A. van Franeker [Jan.vanfraneker@wur.nl](mailto:Jan.vanfraneker@wur.nl)

- 1 Wageningen Marine Research (formerly IMARES),  
Ankerpark 27, 1781 AG Den Helder, The Netherlands.
- 2 Elisa Bravo Ecological and Biological Research
- 3 Department of Pathology, Faculty of Veterinary Medicine, Utrecht University

## **ESM (*Electronic Supplementary Material*) - Contents**

|                                                                                                                                                                                                                                                                                   |           |
|-----------------------------------------------------------------------------------------------------------------------------------------------------------------------------------------------------------------------------------------------------------------------------------|-----------|
| <b>Standardized stomach processing by overflow plus sieving.....</b>                                                                                                                                                                                                              | <b>3</b>  |
| <b>Polymer characterization .....</b>                                                                                                                                                                                                                                             | <b>4</b>  |
| Table S1     Reference list of polymer spectra available in the handheld Phazir .....                                                                                                                                                                                             | 4         |
| <b>Detailed tables of plastic abundance.....</b>                                                                                                                                                                                                                                  | <b>5</b>  |
| Table S2     Plastic abundance in stomachs of harbour porpoises from the Netherlands, all sampling methods combined. ....                                                                                                                                                         | 6         |
| Table S3     Plastic abundance in stomachs of harbour porpoises from the Netherlands, where stomach contents were only investigated by overflow method for diet study. ....                                                                                                       | 7         |
| Table S4     Details for plastic abundance in stomachs of harbour porpoises from the Netherlands, where stomach contents were first investigated by overflow method for diet study plus additional analysis of sample remains captured from the supernatant on a 1 mm sieve. .... | 8         |
| <b>Generalized Linear Mixed Model analyses (GLMM).....</b>                                                                                                                                                                                                                        | <b>9</b>  |
| <b>Literature overview .....</b>                                                                                                                                                                                                                                                  | <b>11</b> |
| Table S5     Literature overview .....                                                                                                                                                                                                                                            | 11        |
| <b>Stomach content detail in table and photo pages.....</b>                                                                                                                                                                                                                       | <b>13</b> |
| Table S6     Details for harbour porpoises with plastics or other litter in stomachs. ....                                                                                                                                                                                        | 14        |
| Photographs of litter in harbour porpoises.....                                                                                                                                                                                                                                   | 16        |

## Standardized stomach processing by overflow plus sieving

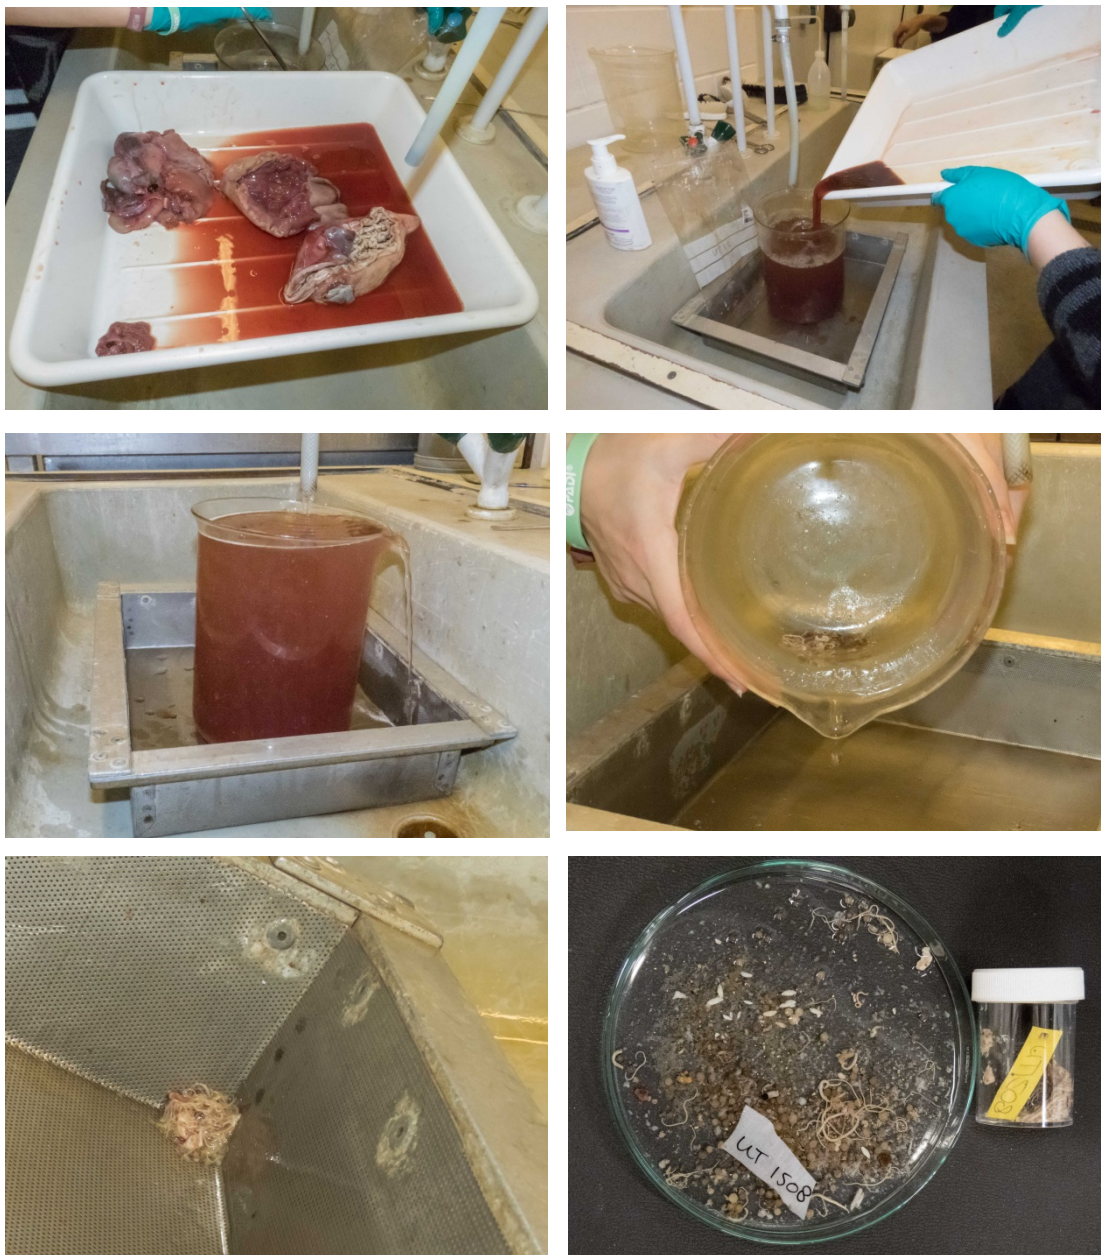

Photographic summary of the overflow method as used in diet studies, but in combination with 1 mm sieving of anything rinsed out of the container. Depending on aims of the study, contents of different stomach compartments (top left) can be treated separately or combined (as here). Stomachs are rinsed out and contents transferred to a glass beaker. The beaker is placed under running water, but on top of a 1 mm sieve tray. Bottom contents of the container are the main sample used for diet study; remaining materials in the sieve are checked for presence of any further material, with special attention for foreign bodies such as plastics. Both samples are checked under binocular microscope. In this standardized approach all stomach contents larger than 1 mm are inspected. General visual inspection of the stomachs, or just overflow without the sieve lack the standardization essential to comparative studies or monitoring.

## Polymer characterization

Characterization of polymers was done with a Phazir Handheld Near Infrared Material analyser (NIR; DTS-PHAZIR-1624 for 1600-2400 nm) which was kindly lend to us by Arend Bolt of the Van Gansewinkel group. The Phazir

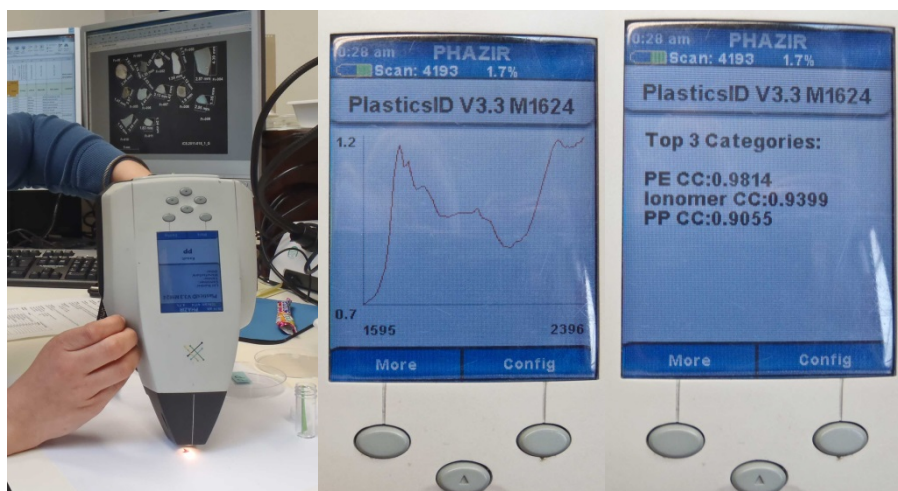

compares the spectra of light reflected by particles to spectra stored in an integrated reference library and returns the 3 most likely options, with a percentage for the match between the spectra; we accepted its first choice when the instrument indicated a match between the measured particle and a reference spectrum of 80% or more. Lower matches are treated as 'not identified (Nold)'. With photographs, when items could not be identified with certainty, we list them as Nold but additionally provide the best first match with percentage of that assessment.

*Table S1 Reference list of polymer spectra available in the handheld Phazir*

| Acronym             | Name/description                                     |
|---------------------|------------------------------------------------------|
| ABS                 | Acrylonitrile butadiene styrene                      |
| CA                  | Cellulose acetate                                    |
| EVA                 | Ethylene-vinyl acetate                               |
| PA                  | Nylon (polyamide)                                    |
| PB                  | Polybutylene                                         |
| PBT                 | Polybutylene terephthalate                           |
| PC                  | Polycarbonate                                        |
| PE                  | Polyethylene                                         |
| PET                 | Polyethylene terephthalate                           |
| PETG                | Polyethylene terephthalate glycol                    |
| PI                  | Polyimide                                            |
| PMMA                | Polymethyl metacrylate                               |
| PMP                 | Polymethyl pentane                                   |
| POM                 | Acetal (Polyoxymethylene)                            |
| PP                  | Polypropylene                                        |
| PPO                 | Polyphenylene oxide                                  |
| PPS                 | Polyphenylene sulfide                                |
| PS                  | Polystyrene                                          |
| PSO                 | Polysulfone                                          |
| PTT                 | Polytrimethylene terephthalate                       |
| PUR                 | Polyurethane                                         |
| PVC                 | Polyvinyl chloride                                   |
| SAN                 | Styrene acrylonitrile                                |
| TPV                 | Thermoplastic elastomer                              |
| Elastomer           | Elastomer (in rubbery materials)                     |
| Ionomer             | Ionomer (in strong packaging films, adhesive layers) |
| Nylon/ABSblend      | Nylon/ABSblend                                       |
| Styrenic terpolymer | Styrenic terpolymer                                  |

## Detailed tables of plastic abundance

Details of plastic abundance by sampling method

- all samples combined (Table S2),
- overflow samples (Table S3), and
- sieved samples (*=combination of litter visually detected in stomach + remains in overflow beaker + remains on 1 mm sieve*) (Table S4)

in harbour porpoises in the Netherlands 2003-2013, with specifications for sexes, ages and time periods.

*Table S2 Plastic abundance in stomachs of harbour porpoises from the Netherlands, all sampling methods combined. %FO is for percentage frequency of occurrence of plastic (also known as incidence or prevalence). Numerical and mass abundance of plastic given as averages for all samples, including those without plastic ('population average').*

| ALL SAMPLES IRRESPECTIVE OF METHOD |     |     | number of particles |       | mass of particles (g) |       |
|------------------------------------|-----|-----|---------------------|-------|-----------------------|-------|
|                                    | N   | %FO | n ± se              | (max) | g ± se                | (max) |
| all                                | 654 | 7%  | 0.11 ± 0.02         | (5)   | 0.009 ± 0.004         | (2.6) |
| <i>by sex</i>                      |     |     |                     |       |                       |       |
| females                            | 280 | 7%  | 0.12 ± 0.03         | (5)   | 0.006 ± 0.003         | (0.7) |
| males                              | 364 | 7%  | 0.10 ± 0.02         | (4)   | 0.012 ± 0.007         | (2.6) |
| unknown sex                        | 10  | 0%  | 0.00 ± 0.00         | (0)   | 0.000 ± 0.000         | (0.0) |
| <i>by age</i>                      |     |     |                     |       |                       |       |
| neonate                            | 47  | 0%  | 0.00 ± 0.00         | (0)   | 0.000 ± 0.000         | (0.0) |
| juvenile                           | 469 | 7%  | 0.10 ± 0.02         | (4)   | 0.010 ± 0.006         | (2.6) |
| adult                              | 137 | 8%  | 0.16 ± 0.06         | (5)   | 0.010 ± 0.005         | (0.6) |
| unknown age                        | 1   | 0%  | 0.00 ± 0.00         | (0)   | 0.000 ± 0.000         | (0.0) |
| <i>by sex and age</i>              |     |     |                     |       |                       |       |
| female neonate                     | 19  | 0%  | 0.00 ± 0.00         | (0)   | 0.000 ± 0.000         | (0.0) |
| female juvenile                    | 179 | 7%  | 0.11 ± 0.04         | (4)   | 0.008 ± 0.004         | (0.7) |
| female adult                       | 82  | 7%  | 0.17 ± 0.08         | (5)   | 0.004 ± 0.004         | (0.3) |
| male neonate                       | 28  | 0%  | 0.00 ± 0.00         | (0)   | 0.000 ± 0.000         | (0.0) |
| male juvenile                      | 280 | 7%  | 0.10 ± 0.03         | (4)   | 0.012 ± 0.009         | (2.6) |
| male adult                         | 55  | 9%  | 0.15 ± 0.08         | (4)   | 0.018 ± 0.012         | (0.6) |
| unknown age                        | 1   | 0%  | 0.00 ± 0.00         | (0)   | 0.000 ± 0.000         | (0.0) |
| unknown sex                        | 10  | 0%  | 0.00 ± 0.00         | (0)   | 0.000 ± 0.000         | (0.0) |
| <i>by year</i>                     |     |     |                     |       |                       |       |
| 2003                               | 2   | 50% | 1.00 ± 1.00         | (2)   | 0.001 ± 0.001         | (0.0) |
| 2004                               | 0   |     |                     |       |                       |       |
| 2005                               | 3   | 67% | 1.33 ± 0.88         | (3)   | 0.063 ± 0.054         | (0.2) |
| 2006                               | 64  | 6%  | 0.08 ± 0.04         | (2)   | 0.004 ± 0.003         | (0.2) |
| 2007                               | 55  | 0%  | 0.00 ± 0.00         | (0)   | 0.000 ± 0.000         | (0.0) |
| 2008                               | 89  | 10% | 0.24 ± 0.09         | (5)   | 0.054 ± 0.031         | (2.6) |
| 2009                               | 57  | 12% | 0.18 ± 0.08         | (4)   | 0.002 ± 0.001         | (0.1) |
| 2010                               | 48  | 10% | 0.19 ± 0.10         | (4)   | 0.010 ± 0.006         | (0.2) |
| 2011                               | 246 | 4%  | 0.06 ± 0.02         | (2)   | 0.001 ± 0.000         | (0.0) |
| 2012                               | 68  | 1%  | 0.01 ± 0.01         | (1)   | 0.000 ± 0.000         | (0.0) |
| 2013                               | 22  | 18% | 0.23 ± 0.11         | (2)   | 0.000 ± 0.000         | (0.0) |
| <i>by pentade</i>                  |     |     |                     |       |                       |       |
| 2000-2004                          | 2   | 50% | 1.00 ± 1.00         | (2)   | 0.001 ± 0.001         | (0.0) |
| 2005-2009                          | 268 | 8%  | 0.15 ± 0.04         | (5)   | 0.020 ± 0.010         | (2.6) |
| 2010-2014                          | 384 | 5%  | 0.08 ± 0.02         | (4)   | 0.002 ± 0.001         | (0.2) |



*Table S3* Plastic abundance in stomachs of harbour porpoises from the Netherlands, where stomach contents were only investigated by overflow method for diet study. Further details see caption for supplement table 1.

| OVERFLOW samples      |          |     | number of particles |       | mass of particles (g) |       |
|-----------------------|----------|-----|---------------------|-------|-----------------------|-------|
|                       | <i>n</i> | %FO | <i>n</i> ± se       | (max) | <i>g</i> ± se         | (max) |
| ALL                   | 572      | 6%  | 0.09 ± 0.02         | (5)   | 0.010 ± 0.005         | (2.6) |
| <i>by sex</i>         |          |     |                     |       |                       |       |
| females               | 249      | 7%  | 0.13 ± 0.04         | (5)   | 0.006 ± 0.003         | (0.7) |
| males                 | 314      | 4%  | 0.06 ± 0.02         | (4)   | 0.013 ± 0.009         | (2.6) |
| unknown sex           | 9        | 0%  | 0.00 ± 0.00         | (0)   | 0.000 ± 0.000         | (0.0) |
| <i>by age</i>         |          |     |                     |       |                       |       |
| neonates              | 45       | 0%  | 0.00 ± 0.00         | (0)   | 0.000 ± 0.000         | (0.0) |
| juveniles             | 404      | 5%  | 0.08 ± 0.02         | (4)   | 0.011 ± 0.007         | (2.6) |
| adults                | 123      | 8%  | 0.15 ± 0.06         | (5)   | 0.010 ± 0.006         | (0.6) |
| <i>by sex and age</i> |          |     |                     |       |                       |       |
| female neonates       | 19       | 0%  | 0.00 ± 0.00         | (0)   | 0.000 ± 0.000         | (0.0) |
| female juveniles      | 156      | 8%  | 0.12 ± 0.04         | (4)   | 0.008 ± 0.005         | (0.7) |
| female adults         | 74       | 8%  | 0.19 ± 0.09         | (5)   | 0.005 ± 0.004         | (0.3) |
| male neonates         | 26       | 0%  | 0.00 ± 0.00         | (0)   | 0.000 ± 0.000         | (0.0) |
| male juveniles        | 239      | 4%  | 0.06 ± 0.02         | (4)   | 0.013 ± 0.011         | (2.6) |
| male adults           | 49       | 8%  | 0.08 ± 0.04         | (1)   | 0.018 ± 0.013         | (0.6) |
| unknown sex           | 9        | 0%  | 0.00 ± 0.00         | (0)   | 0.000 ± 0.000         | (0.0) |
| <i>by year</i>        |          |     |                     |       |                       |       |
| 2003                  | 2        | 50% | 1.00 ± 1.00         | (2)   | 0.001 ± 0.001         | (0.0) |
| 2004                  | 0        |     |                     |       |                       |       |
| 2005                  | 3        | 67% | 1.33 ± 0.88         | (3)   | 0.063 ± 0.054         | (0.2) |
| 2006                  | 64       | 6%  | 0.08 ± 0.04         | (2)   | 0.004 ± 0.003         | (0.2) |
| 2007                  | 55       | 0%  | 0.00 ± 0.00         | (0)   | 0.000 ± 0.000         | (0.0) |
| 2008                  | 88       | 10% | 0.24 ± 0.09         | (5)   | 0.054 ± 0.031         | (2.6) |
| 2009                  | 57       | 12% | 0.18 ± 0.08         | (4)   | 0.002 ± 0.001         | (0.1) |
| 2010                  | 40       | 5%  | 0.05 ± 0.03         | (1)   | 0.006 ± 0.006         | (0.2) |
| 2011                  | 207      | 3%  | 0.04 ± 0.02         | (2)   | 0.000 ± 0.000         | (0.0) |
| 2012                  | 49       | 0%  | 0.00 ± 0.00         | (0)   | 0.000 ± 0.000         | (0.0) |
| 2013                  | 7        | 0%  | 0.00 ± 0.00         | (0)   | 0.000 ± 0.000         | (0.0) |
| <i>by pentade</i>     |          |     |                     |       |                       |       |
| 2000-2004             | 2        | 50% | 1.00 ± 1.00         | (2)   | 0.001 ± 0.001         | (0.0) |
| 2005-2009             | 267      | 8%  | 0.15 ± 0.04         | (5)   | 0.020 ± 0.010         | (2.6) |
| 2010-2014             | 303      | 3%  | 0.03 ± 0.01         | (2)   | 0.001 ± 0.001         | (0.2) |

*Table S4* Details for plastic abundance in stomachs of harbour porpoises from the Netherlands, where stomach contents were first investigated by overflow method for diet study plus additional analysis of sample remains captured from the supernatant on a 1 mm sieve. Further details see caption for supplement table 1.

| OVERFLOW+SIEVED samples |    |     | number of particles |       | mass of particles (g) |       |
|-------------------------|----|-----|---------------------|-------|-----------------------|-------|
|                         | N  | %FO | n ± se              | (max) | g ± se                | (max) |
| ALL                     | 82 | 15% | 0.23 ± 0.07         | (4)   | 0.004 ± 0.002         | (0.1) |
| <i>by sex</i>           |    |     |                     |       |                       |       |
| females                 | 31 | 3%  | 0.03 ± 0.03         | (1)   | 0.004 ± 0.004         | (0.1) |
| males                   | 50 | 22% | 0.36 ± 0.11         | (4)   | 0.004 ± 0.002         | (0.1) |
| unknown sex             | 1  | 0%  | 0.00 ± 0.00         | (0)   | 0.000 ± 0.000         | (0.0) |
| <i>by age</i>           |    |     |                     |       |                       |       |
| neonates                | 2  | 0%  | 0.00 ± 0.00         | (0)   | 0.000 ± 0.000         | (0.0) |
| juveniles               | 65 | 17% | 0.23 ± 0.07         | (2)   | 0.003 ± 0.002         | (0.1) |
| adults                  | 14 | 7%  | 0.29 ± 0.29         | (4)   | 0.008 ± 0.008         | (0.1) |
| unknown age             | 1  | 0%  | 0.00 ± 0.00         | (0)   | 0.000 ± 0.000         | (0.0) |
| <i>by sex and age</i>   |    |     |                     |       |                       |       |
| female neonates         | 0  |     |                     |       |                       |       |
| female juveniles        | 23 | 4%  | 0.04 ± 0.04         | (1)   | 0.005 ± 0.005         | (0.1) |
| female adults           | 8  | 0%  | 0.00 ± 0.00         | (0)   | 0.000 ± 0.000         | (0.0) |
| male neonates           | 2  | 0%  | 0.00 ± 0.00         | (0)   | 0.000 ± 0.000         | (0.0) |
| male juveniles          | 41 | 24% | 0.34 ± 0.10         | (2)   | 0.003 ± 0.001         | (0.0) |
| male adults             | 6  | 17% | 0.67 ± 0.67         | (4)   | 0.018 ± 0.018         | (0.1) |
| unknown age             | 1  | 0%  | 0.00 ± 0.00         | (0)   | 0.000 ± 0.000         | (0.0) |
| unknown sex             | 1  | 0%  | 0.00 ± 0.00         | (0)   | 0.000 ± 0.000         | (0.0) |
| <i>by year</i>          |    |     |                     |       |                       |       |
| 2003                    | 0  |     |                     |       |                       |       |
| 2004                    | 0  |     |                     |       |                       |       |
| 2005                    | 0  |     |                     |       |                       |       |
| 2006                    | 0  |     |                     |       |                       |       |
| 2007                    | 0  |     |                     |       |                       |       |
| 2008                    | 1  | 0%  | 0.00 ± 0.00         | (0)   | 0.000 ± 0.000         | (0.0) |
| 2009                    | 0  |     |                     |       |                       |       |
| 2010                    | 8  | 38% | 0.88 ± 0.52         | (4)   | 0.028 ± 0.018         | (0.1) |
| 2011                    | 39 | 10% | 0.15 ± 0.08         | (2)   | 0.002 ± 0.001         | (0.0) |
| 2012                    | 19 | 5%  | 0.05 ± 0.05         | (1)   | 0.000 ± 0.000         | (0.0) |
| 2013                    | 15 | 27% | 0.33 ± 0.16         | (2)   | 0.001 ± 0.000         | (0.0) |
| <i>by pentade</i>       |    |     |                     |       |                       |       |
| 2000-2004               | 0  |     |                     |       |                       |       |
| 2005-2009               | 1  | 0%  | 0.00 ± 0.00         | (0)   | 0.000 ± 0.000         | (0.0) |
| 2010-2014               | 81 | 15% | 0.23 ± 0.07         | (4)   | 0.004 ± 0.002         | (0.1) |



## Generalized Linear Mixed Model analyses (GLMM)

GLLM analyses were conducted in order to check for variables potentially correlated to plastic presence in harbour porpoises. Multi-variate model analyses were performed using:

- 1) the full data-set (n=654),
- 2) the data restricted to years for which samples of both types of processing were available (n=384)
- 3) samples processed by the standard method (overflow followed by sieving; n=82)

A major problem with dataset 1 is that it is biased in the sense that the standardized method of sample processing (=overflow+sieving), has virtually not been applied to samples prior to year 2010. A problem affecting analyses of datasets 1 as well as 2 is that 'the overflow method' is not a fixed situation, as variations in detection of litter may have been caused by variability in abundance and decay level of natural stomach contents, or by different persons using different speeds or duration for the overflow rinsing and/or giving different attention to outflowing materials. These problems are of course avoided if only using the standardized samples for an analysis of further variates affecting records of plastic ingestion. However, that sample is currently still very small.

The analyses were conducted using Genstat 18th edition and are based on REsidual Maximum Likelihood (REML). A range of models using different variable selections in different sequences was analysed, which in general resulted in fairly similar significance level of a variable in the models. Results shown below give the Genstat output for models using all variables in a (in general) decreasing level of importance in the models

**GLLM Method** c.f. Schall (1991) Biometrika 78: 719-727.

**Response variate:** PLAIncT (=plastic presence: absent=0 present=1)

Distribution: binomial Link function: logit

### Variables used in models

STC1mm = factor (sample method: 0 for only overflow; 1 for overflow + sieve)

YEAR = variate (years 2003 to 2013, or subset)

DEMFISH\_G = variate (mass of benthic fish reconstructed from otoliths)

NNFO = variate (number of non-food items like shells, stones, bogwood, etc)

PELFISH\_G = variate (mass of pelagic fish reconstructed from otoliths)

AGE = factor ( Adult, Juvenile, Neonate or unknown)

SEX = factor ( Male; Female; or unknown)

REGION = factor (one of 8 subareas in the Netherlands or unknown)

NCC = variate (Nutritive Body Code from 1 for very good, to 6 very poor)

After initial trials, body condition (NCC) was left out of model runs because warnings by GENSTAT indicated that many missing values affected model runs, and no indication existed of any correlation to plastic ingestion.

### Model 1: All data *n=654* (572 overflow and 82 standard method (overflow + sieved)

Constant + STC1mm + YEAR + demfish\_g + NNFO + pelfish\_g + Age + Sex + Region

Sequentially adding terms to fixed model

| Fixed term | Wald statistic | n.d.f. | F statistic | d.d.f. | F pr  |
|------------|----------------|--------|-------------|--------|-------|
| STC1MM     | 5.91           | 1      | 5.91        | 635    | 0.015 |
| YEAR       | 5.63           | 1      | 5.63        | 635    | 0.018 |
| DEMFISH_G  | 6.09           | 1      | 6.09        | 635    | 0.014 |
| NNFO       | 1.59           | 1      | 1.59        | 635    | 0.207 |
| PELFISH_G  | 1.07           | 1      | 1.07        | 635    | 0.302 |
| AGE        | 1.29           | 3      | 0.43        | 635    | 0.731 |
| SEX        | 0.12           | 2      | 0.06        | 635    | 0.941 |
| REGION     | 1.88           | 8      | 0.23        | 635    | 0.984 |

Dropping individual terms from full fixed model

| Fixed term | Wald statistic | n.d.f. | F statistic | d.d.f. | F pr   |
|------------|----------------|--------|-------------|--------|--------|
| STC1MM     | 12.70          | 1      | 12.70       | 635    | <0.001 |
| YEAR       | 5.52           | 1      | 5.52        | 635    | 0.019  |
| DEMFISH_G  | 2.05           | 1      | 2.05        | 635    | 0.153  |
| NNFO       | 3.27           | 1      | 3.27        | 635    | 0.071  |
| PELFISH_G  | 1.70           | 1      | 1.70        | 635    | 0.192  |
| AGE        | 1.41           | 3      | 0.47        | 635    | 0.703  |
| SEX        | 0.10           | 2      | 0.05        | 635    | 0.951  |
| REGION     | 1.88           | 8      | 0.23        | 635    | 0.984  |

## Model 2: data restricted to years when both methods had been applied data 2010-2013 $n=384$ (303 overflow and 81 standard method (overflow + sieved))

Constant + STC1mm + YEAR + demfish\_g + NNFO + pelfish\_g + Age + Sex + Region

Sequentially adding terms to fixed model

| Fixed term | Wald statistic | n.d.f. | F statistic | d.d.f. | F pr   |
|------------|----------------|--------|-------------|--------|--------|
| STC1MM     | 11.59          | 1      | 11.59       | 365    | <0.001 |
| YEAR       | 1.18           | 1      | 1.18        | 365    | 0.278  |
| DEMFISH_G  | 1.21           | 1      | 1.21        | 365    | 0.272  |
| NNFO       | 0.63           | 1      | 0.63        | 365    | 0.428  |
| PELFISH_G  | 0.21           | 1      | 0.21        | 365    | 0.650  |
| AGE        | 0.06           | 3      | 0.02        | 365    | 0.996  |
| SEX        | 0.15           | 2      | 0.07        | 365    | 0.930  |
| REGION     | 4.85           | 8      | 0.61        | 365    | 0.773  |

Dropping individual terms from full fixed model

| Fixed term | Wald statistic | n.d.f. | F statistic | d.d.f. | F pr   |
|------------|----------------|--------|-------------|--------|--------|
| STC1MM     | 15.76          | 1      | 15.76       | 365    | <0.001 |
| YEAR       | 1.11           | 1      | 1.11        | 365    | 0.294  |
| DEMFISH_G  | 0.09           | 1      | 0.09        | 365    | 0.769  |
| NNFO       | 0.10           | 1      | 0.10        | 365    | 0.749  |
| PELFISH_G  | 0.20           | 1      | 0.20        | 365    | 0.653  |
| AGE        | 0.12           | 3      | 0.04        | 365    | 0.989  |
| SEX        | 0.18           | 2      | 0.09        | 365    | 0.914  |
| REGION     | 4.85           | 8      | 0.61        | 365    | 0.773  |

## Model 3: data for sieved samples (standardized method)

data  $n=82$  (standard method = overflow+sieve)

Constant + YEAR + demfish\_g + NNFO + pelfish\_g + Age + Sex

Sequentially adding terms to fixed model

| Fixed term | Wald statistic | n.d.f. | F statistic | d.d.f. | F pr  |
|------------|----------------|--------|-------------|--------|-------|
| YEAR       | 0.10           | 1      | 0.10        | 72     | 0.756 |
| DEMFISH_G  | 0.51           | 1      | 0.51        | 72     | 0.479 |
| NNFO       | 0.30           | 1      | 0.30        | 72     | 0.586 |
| PELFISH_G  | 0.84           | 1      | 0.84        | 72     | 0.362 |
| AGE        | 0.09           | 3      | 0.03        | 72     | 0.993 |
| SEX        | 3.28           | 2      | 1.64        | 72     | 0.201 |

Dropping individual terms from full fixed model

| Fixed term | Wald statistic | n.d.f. | F statistic | d.d.f. | F pr  |
|------------|----------------|--------|-------------|--------|-------|
| YEAR       | 0.01           | 1      | 0.01        | 72     | 0.920 |
| DEMFISH_G  | 0.20           | 1      | 0.20        | 72     | 0.657 |
| NNFO       | 1.60           | 1      | 1.60        | 72     | 0.210 |
| PELFISH_G  | 1.26           | 1      | 1.26        | 72     | 0.266 |
| AGE        | 0.16           | 3      | 0.05        | 72     | 0.983 |
| SEX        | 3.28           | 2      | 1.64        | 72     | 0.201 |

Region omitted from this model because causing fault messages in this model calculation

## Literature overview

**Table S5 Literature overview of records of litter ingestion in harbour porpoises and other porpoise species.**

| <b>A. harbour porpoise - individual records</b> |                        |           |        |                                                                                                                        |
|-------------------------------------------------|------------------------|-----------|--------|------------------------------------------------------------------------------------------------------------------------|
| source                                          | area                   | period    | sample | notes                                                                                                                  |
| Bosch 1950                                      | Netherlands            | 1950      | 1      | Unripe banana                                                                                                          |
| Walker and Coe 1990                             | US Coast               | 1963-1986 | 1      | Piece of cloth and plastic                                                                                             |
| Kastelein and Lavaleije 1992                    | North Sea, Netherlands | 1991      | 1      | Failed rehabilitation: regurgitated plastic bag, nylon fishing and a banana peel likely blocking passage               |
| Baird and Hooker 2000                           | Nova Scotia, Canada    | 1997      | 1      | Ball of plastic blocking passage to stomach                                                                            |
| Bogomolni et al. 2010                           | Massachusetts, USA     | 2000-2006 | ?      | 30 animals studied, but unclear how many stomachs and how investigated; one animal reported with diverse plastic items |

| <b>B. harbour porpoise – larger sample studies</b> |                                |           |             |       |                                                                                              |
|----------------------------------------------------|--------------------------------|-----------|-------------|-------|----------------------------------------------------------------------------------------------|
| Source                                             | area                           | period    | sample size | %FO   | method plastic detection                                                                     |
| De Pierrepont et al. 2005                          | Normandy, France               | 1998-2003 | 7           | 0     | sieved 1mm mesh size                                                                         |
| Haelters et al. 2012                               | North Sea, Belgium             | 1997-2011 | 64          | 0     | sieved (315µm)                                                                               |
| Deville et al. 2010                                | United Kingdom                 | 2005-2010 | 459         | 2.2%  | visual examination                                                                           |
| Unger et al. 2017                                  | North and Baltic Seas, Germany | 1990-2014 | 548         | 0.7%  | visual examination (North Sea only 1.2%FO in 241 animals)                                    |
| Lusher et al. 2017                                 | Ireland                        | 1990-2015 | 125         | 4.8%  | Visual examination (21 samples sieved over 0.118 µm all had microplastics almost all fibres) |
| Birkun and Krivokhizhin 2014                       | Black Sea, Ukraine             | 2008-2009 | 12          | 0     | unclear                                                                                      |
| Tonay et al. 2007                                  | Black Sea, Turkey              | 2002-2003 | 42          | 11.9% | sieved (200µm)                                                                               |

| <b>C. other porpoise species plastic ingestion</b> |                                                       |                                                  |            |             |     |                                             |
|----------------------------------------------------|-------------------------------------------------------|--------------------------------------------------|------------|-------------|-----|---------------------------------------------|
| source                                             | species                                               | area                                             | period     | Sample size | %FO | notes                                       |
| Baird and Hooker 2000                              | Finless Porpoise ( <i>Neophocaena phocaenoides</i> )  | ?                                                | ?          | ?           | +   | Unpublished(C. Parsons pers comm)           |
| Baulch and Perry 2014                              | Burmeister's Porpoise ( <i>Phocoena spinipinnis</i> ) | ?                                                | ?          | ?           | +   | Unpublished: 2 known Denuncio pers comm)    |
| Walker and Coe 1990 (Table 1)                      | Dall's Porpoise ( <i>Phocoenoides dalli</i> )         | California                                       | 1973, 1978 | ?           | +   | 3 individual cases with mainly plastic bags |
| Walker and Coe 1990 (Table 2)                      | Dall's Porpoise ( <i>Phocoenoides dalli</i> )         | Japan (86), North Pacific (815), California (17) | 1958-1988  | 918         | 0   | Unclear methods                             |

## References

- Baird, R.W., and Hooker, S.K. 2000. Ingestion of plastic and unusual prey by a juvenile Harbour Porpoise. *Marine Pollution Bulletin* 40: 719-720.  
<http://www.sciencedirect.com/science/article/pii/S0025326X00000515>
- Baulch, S., and Perry, C. 2014. Evaluating the impacts of marine debris on cetaceans. *Marine Pollution Bulletin* 80, 210-221. <http://dx.doi.org/10.1016/j.marpolbul.2013.12.050>
- Birkun, A.A.Jr., and Krivokhizhin, S. 2008. Involvement of Black Sea artisanal fisheries in anti-bycatch and anti-marine litter activities. Report to the Permanent Secretariat of the Commission on the Protection of the Black Sea Against Pollution (BSC) and Permanent Secretariat of the Agreement on the Conservation of Cetaceans of the Black Sea, Mediterranean Sea and contiguous Atlantic area (ACCOBAMS). 52 pp.  
<https://accobams.org/file.php/1481/Annex%20D%20Final%20Report.pdf>
- Bogomolni, A.L., Pugliares, K.R., Sharp, S.M., Patchett, K., Harry, C.T., LaRocque, J.M., Touhey, K.M., and Moore, M.J. 2010. Mortality trends of stranded marine mammals on Cape Cod and southeastern Massachusetts, USA, 2000 to 2006. *Diseases of Aquatic Organisms* 88: 143-155.  
<https://www.ncbi.nlm.nih.gov/pubmed/20225675>
- Bosch G. 1950. Bruinvis eet banaan. *Vanellus* 3(5): 58
- De Pierrepont, J.F., Dubois, B., Desormonts, S., Santos, M.B., and Robin, J.P. 2005. Stomach contents of English Channel cetaceans stranded on the coast of Normandy. *Journal of the Marine Biological Association of the United Kingdom* 85: 1539-1546.  
<https://doi.org/10.1017/S0025315405012762>
- Deaville, R., Jepson, P.D., Brownlow, A., Reid, R.J., Smith, B., Duffell, E.L., Sabin, R.C., Penrose, R., and Perkins, M. 2010. CSIP Final Report for the period 1 st January 2005 - 31 st December 2010 (Covering contract numbers CR0346 and CR0364). UK Cetacean Strandings Investigation Programme, 98pp [www.ukstrandings.org](http://www.ukstrandings.org)
- Haelters, J., Kerckhof, F., Toussaint, E., Jauniaux, T., Degraer, S. 2012. The diet of harbour porpoises bycaught or washed ashore in Belgium, and relationship with relevant data from the strandings database. Royal Belgian Institute of Natural Sciences, 46pp.  
[www.vliz.be/imisdocs/publications/240631.pdf](http://www.vliz.be/imisdocs/publications/240631.pdf)
- Kastelein, R.A., and Lavaleije, S.S. 1992. Foreign bodies in the stomach of a female harbour porpoise (*Phocoena phocoena*) from the North Sea. *Aquatic Mammals* 18: 40-46.  
[http://www.aquaticmammalsjournal.org/share/AquaticMammalsIssueArchives/1992/Aquatic\\_Mammals\\_18\\_2/Kastelein.pdf](http://www.aquaticmammalsjournal.org/share/AquaticMammalsIssueArchives/1992/Aquatic_Mammals_18_2/Kastelein.pdf)
- Lusher, A.L., Hernandez-Milian, G., Berrow, S., Rogan, E. and O'Connor, I. 2017. Incidence of marine debris in cetaceans stranded and bycaught in Ireland: Recent findings and a review of historical knowledge. *Environmental Pollution* xx: xx-xx (online)  
<https://doi.org/10.1016/j.envpol.2017.09.070>
- Payne, R., Murray, D. & Harding, S. 2015. An Introduction to the Genstat Command Language (18th Edition).. VSN International. Hemel Hempstead, UK. 133pp.  
<http://cdn.vsnl.co.uk/downloads/genstat/release18/doc/CommandIntro.pdf>
- Schall, R. 1991. Estimation in generalized linear models with random effects. *Biometrika* 78: 719-727. <https://doi.org/10.1093/biomet/78.4.719>
- Tonay, A.M., Dede, A., Öztürk, A.A., and Öztürk, B. 2007. Stomach content of harbour porpoises (*Phocoena phocoena*) from the Turkish Western Black Sea in spring and early summer. *Rapport Commission Internationale pour L'Exploration Scientifique de la Mer Méditerranée*, 38, 616. <http://citeseerx.ist.psu.edu/viewdoc/download?doi=10.1.1.540.1963&rep=rep1&type=pdf>
- Unger, B., Herr, H., Benke, H., Böhmert, M., Burkhardt-Holm, P., Dähne, M., Hillmann, M., Wolff-Schmidt, K., Wohlsein, P. & Siebert, U. 2017. Marine debris in harbour porpoises and seals from German waters. *Marine Environmental Research* 130: 77-84.  
<https://doi.org/10.1016/j.marenvres.2017.07.009>
- Walker, W.A., and Coe, J.M. 1990. Survey of marine debris ingestion by odontocete cetaceans. p 747-774 in: Shomura, R.S. and M.L. Godfrey (Eds). *Proceedings of the second international conference on marine debris*, 2-7 April 1989, Honolulu, Hawaii. U.S. Dep. Commer., NOAA Techn. Memo. NMFS, NOAA-TM-NMFS-SFWC-154.  
<http://citeseerx.ist.psu.edu/viewdoc/download?doi=10.1.1.573.3472&rep=rep1&type=pdf>

## Stomach content detail in table and photo pages

**The table** (S6) shows a listing of all harbour stomach content samples that contained litter, with sample number, year of collection, number of industrial and user plastics or other non-synthetic materials, and whether items were detected in the overflow phase of sample processing, or only after microscopic inspection of materials collected from the 1 mm sieve.

**Photographs following the table** show all stomachs contents of the harbour porpoises that contained litter listed in Table S6.

In photos particle sizes can be read from scale bars: scale numbers refer to centimetres, with 0.5 cm and 1 mm submarkers. Notes with photo's provide information on plastic category (industrial, user sheet, thread, foam, fragment or other), the polymer basis of the items shown as assessed by Phazir Hand-held NIR (see above) and mass of items (in gram to 4<sup>th</sup> decimal).

In many cases the polymer basis could not be identified. Such cases texts mention **No ID** (= not identified), but nevertheless the highest polymer matching type with the library is provided in brackets with the percentage. For example this could be **Sheet No ID (PP 73%)** for a sheetlike plastic item possibly being polypropylene, but with an insufficient match to consider the identification reliable.

When the match to the reference library was 80% or higher the information is provided as for example **Fragment PE (86%)** for a certain particle of Polyethylene plastic at 86% match. Acronyms for plastic types are given in Table S1.

**Table S6** Details for harbour porpoises with plastics or other litter in stomachs. For the two detection columns on the right, 1 means that plastic was detected during the indicated procedure, 0 that it was not detected. Blanks in the last column indicate that no sieved remains were collected and studied.

#### Plastics

| Sample number     | year | number of industrial plastics | number of user plastics | total number of plastic particles | total mass of plastic particles (g) | detected during flow procedure | detected in sieved remains |
|-------------------|------|-------------------------------|-------------------------|-----------------------------------|-------------------------------------|--------------------------------|----------------------------|
| MFL-HAPO-TX0003   | 2005 | 0                             | 1                       | 1                                 | 0.0192                              | 1                              |                            |
| MFL-HAPO-TX0005   | 2003 | 0                             | 2                       | 2                                 | 0.0016                              | 1                              |                            |
| MFL-HAPO-TX0006   | 2006 | 0                             | 1                       | 1                                 | 0.0123                              | 1                              |                            |
| MFL-HAPO-TX0011   | 2006 | 0                             | 1                       | 1                                 | 0.0196                              | 1                              |                            |
| MFL-HAPO-TX0012   | 2005 | 0                             | 3                       | 3                                 | 0.1710                              | 1                              |                            |
| MFL-HAPO-TX0038   | 2006 | 0                             | 2                       | 2                                 | 0.2080                              | 1                              |                            |
| MFL-HAPO-TX0049   | 2006 | 0                             | 1                       | 1                                 | 0.0038                              | 1                              |                            |
| MFL-HAPO-UT0101   | 2008 | 0                             | 4                       | 4                                 | 0.1354                              | 1                              |                            |
| MFL-HAPO-UT0108   | 2008 | 0                             | 4                       | 4                                 | 0.0158                              | 1                              |                            |
| MFL-HAPO-UT0122   | 2008 | 0                             | 3                       | 3                                 | 0.2234                              | 1                              |                            |
| MFL-HAPO-UT0145   | 2008 | 0                             | 1                       | 1                                 | 0.3138                              | 1                              |                            |
| MFL-HAPO-UT0151   | 2008 | 0                             | 5                       | 5                                 | 0.2960                              | 1                              |                            |
| MFL-HAPO-UT0153   | 2008 | 0                             | 1                       | 1                                 | 0.6086                              | 1                              |                            |
| MFL-HAPO-UT0164   | 2008 | 0                             | 1                       | 1                                 | 2.5722                              | 1                              |                            |
| MFL-HAPO-UT0177   | 2008 | 0                             | 1                       | 1                                 | 0.0037                              | 1                              |                            |
| MFL-HAPO-UT0180   | 2008 | 0                             | 1                       | 1                                 | 0.6596                              | 1                              |                            |
| MFL-HAPO-UT0193   | 2009 | 0                             | 1                       | 1                                 | 0.0059                              | 1                              |                            |
| MFL-HAPO-UT0197   | 2009 | 0                             | 1                       | 1                                 | 0.0023                              | 1                              |                            |
| MFL-HAPO-UT0201   | 2009 | 0                             | 1                       | 1                                 | 0.0003                              | 1                              |                            |
| MFL-HAPO-UT0208   | 2009 | 0                             | 1                       | 1                                 | 0.0010                              | 1                              |                            |
| MFL-HAPO-UT0210   | 2009 | 0                             | 4                       | 4                                 | 0.0153                              | 1                              |                            |
| MFL-HAPO-UT0232   | 2009 | 0                             | 1                       | 1                                 | 0.0746                              | 1                              |                            |
| MFL-HAPO-UT0238 * | 2009 | 0                             | 1                       | 1                                 | 0.0100                              | 1                              |                            |
| MFL-HAPO-UT0348   | 2010 | 0                             | 1                       | 1                                 | 0.0114                              | 1                              |                            |
| MFL-HAPO-UT0360   | 2010 | 0                             | 4                       | 4                                 | 0.1104                              | 1                              | 0                          |
| MFL-HAPO-UT0384   | 2010 | 0                             | 1                       | 1                                 | 0.1137                              | 1                              | 0                          |
| MFL-HAPO-UT0413** | 2010 | 0                             | 2                       | 2                                 | 0.0021                              | 1                              | 1                          |
| MFL-HAPO-UT0435   | 2011 | 0                             | 1                       | 1                                 | 0.0074                              | 0                              | 1                          |
| MFL-HAPO-UT0444   | 2011 | 0                             | 1                       | 1                                 | 0.0037                              | 1                              |                            |
| MFL-HAPO-UT0471   | 2011 | 0                             | 1                       | 1                                 | 0.0071                              | 1                              |                            |
| MFL-HAPO-UT0510   | 2011 | 0                             | 1                       | 1                                 | 0.0041                              | 1                              |                            |
| MFL-HAPO-UT0511   | 2011 | 0                             | 1                       | 1                                 | 0.0013                              | 1                              |                            |
| MFL-HAPO-UT0516   | 2011 | 0                             | 2                       | 2                                 | 0.0335                              | 1                              |                            |



|                 |               |          |           |           |               |           |          |
|-----------------|---------------|----------|-----------|-----------|---------------|-----------|----------|
| MFL-HAPO-UT0532 | 2010          | 0        | 1         | 1         | 0.2457        | 1         |          |
| MFL-HAPO-UT0605 | 2011          | 0        | 1         | 1         | 0.0032        | 1         |          |
| MFL-HAPO-UT0617 | 2011          | 0        | 1         | 1         | 0.0111        | 1         |          |
| MFL-HAPO-UT0687 | 2011          | 0        | 1         | 1         | 0.0389        | 1         | 0        |
| MFL-HAPO-UT0714 | 2012          | 0        | 1         | 1         | 0.0001        | 0         | 1        |
| MFL-HAPO-UT0799 | 2011          | 1        | 1         | 2         | 0.0344        | 0         | 1        |
| MFL-HAPO-UT0867 | 2013          | 0        | 1         | 1         | 0.0001        | 1         | 0        |
| MFL-HAPO-UT0932 | 2011          | 1        | 1         | 2         | 0.0155        | 0         | 1        |
| MFL-HAPO-UT0945 | 2013          | 0        | 1         | 1         | 0.0006        | 0         | 1        |
| MFL-HAPO-UT0974 | 2013          | 0        | 2         | 2         | 0.0050        | 1         | 0        |
| MFL-HAPO-UT0983 | 2013          | 0        | 1         | 1         | 0.0031        | 0         | 1        |
| <b>44</b>       | <b>totals</b> | <b>2</b> | <b>69</b> | <b>71</b> | <b>6.0258</b> | <b>38</b> | <b>7</b> |

#### Non synthetic litter

| Sample number     | year          | non synthetic<br>litter description | number<br>of other<br>litter | mass of<br>other litter | detected<br>during<br>flow<br>procedur<br>e | detected<br>in sieved<br>remains |
|-------------------|---------------|-------------------------------------|------------------------------|-------------------------|---------------------------------------------|----------------------------------|
| MFL-HAPO-TX0040   | 2006          | <i>paper</i>                        | 1                            | 0.0051                  | 1                                           |                                  |
| MFL-HAPO-UT0221   | 2009          | <i>non synthetic<br/>rope</i>       | 1                            | 1.1426                  | 1                                           |                                  |
| MFL-HAPO-UT0238 * | 2009          | <i>fishhook</i>                     | 1                            | 0.1000                  | 1                                           |                                  |
| MFL-HAPO-UT0674   | 2011          | <i>paper</i>                        | 2                            | 0.0001                  | 1                                           | 0                                |
| <b>4</b>          | <b>totals</b> |                                     | <b>5</b>                     | <b>1.2478</b>           | <b>4</b>                                    | <b>0</b>                         |

#### Plastic and other litter totals

| number of positive<br>samples (in 654<br>stomachs<br>investigated) | years          | number<br>of<br>industri<br>al<br>plastics | number<br>of user<br>plastics | total<br>number<br>of litter | total mass<br>litter | detected<br>during<br>flow<br>procedur<br>e | detected<br>in sieved<br>remains |
|--------------------------------------------------------------------|----------------|--------------------------------------------|-------------------------------|------------------------------|----------------------|---------------------------------------------|----------------------------------|
| <b>47 *</b>                                                        | <b>2003-13</b> | <b>2</b>                                   | <b>69</b>                     | <b>76</b>                    | <b>7.2736</b>        | <b>42</b>                                   | <b>7</b>                         |

#### notes

\* MFL-HAPO-UT0238 had both synthetic (nylon line) and non-synthetic litter (metal fishhook) in one item.

\*\* In 6 out of 7 cases where plastics were detected in sieved remains, no litter had been detected before,

only in MFL-HAPO-UT0413 plastics were detected during overflow as well as in sieved remains

*Photographs of litter in harbour porpoises*

**MFL-HAPO-TX0003**

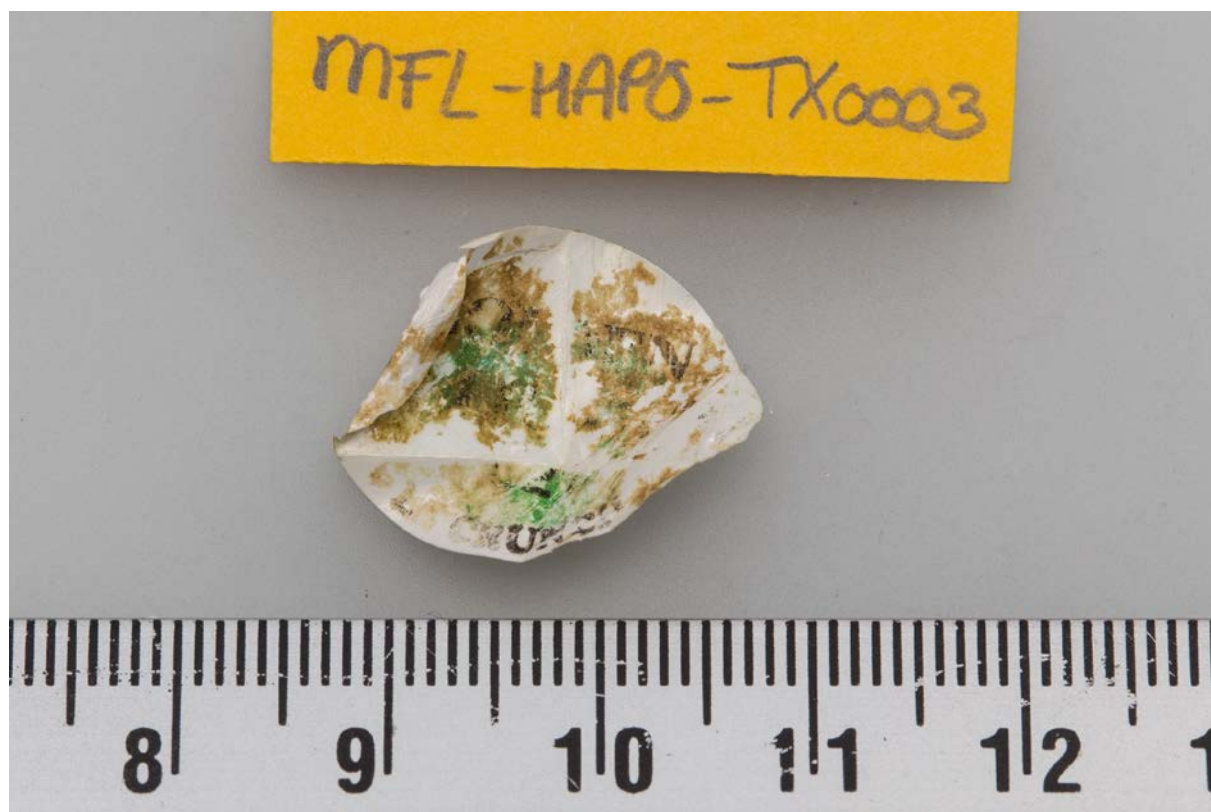

**Sheet No ID (PP 53%) Mass 0.0192 g**

MFL-HAPO-TX0005

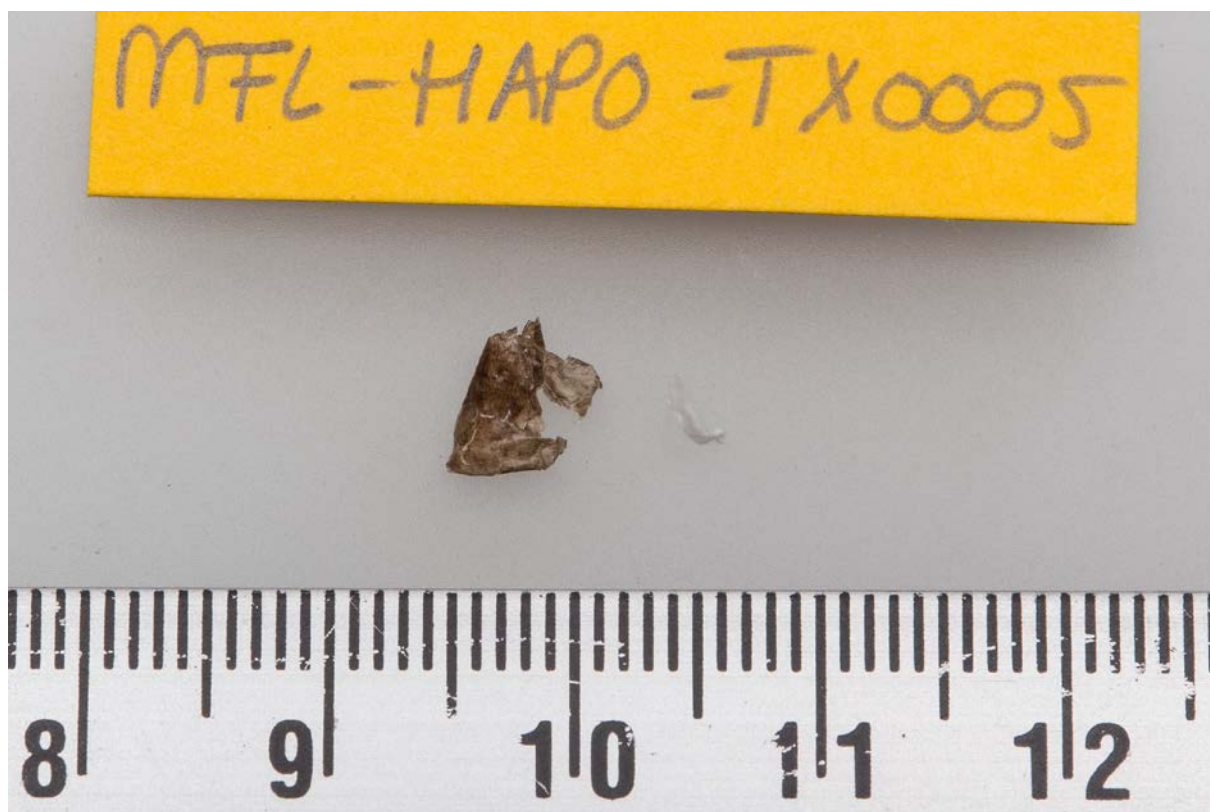

Left Sheet No ID (PA 72%) Mass 0.0016 g;

Right Sheet No NIR assessment or separate mass recorded

MFL-HAPO-TX0006

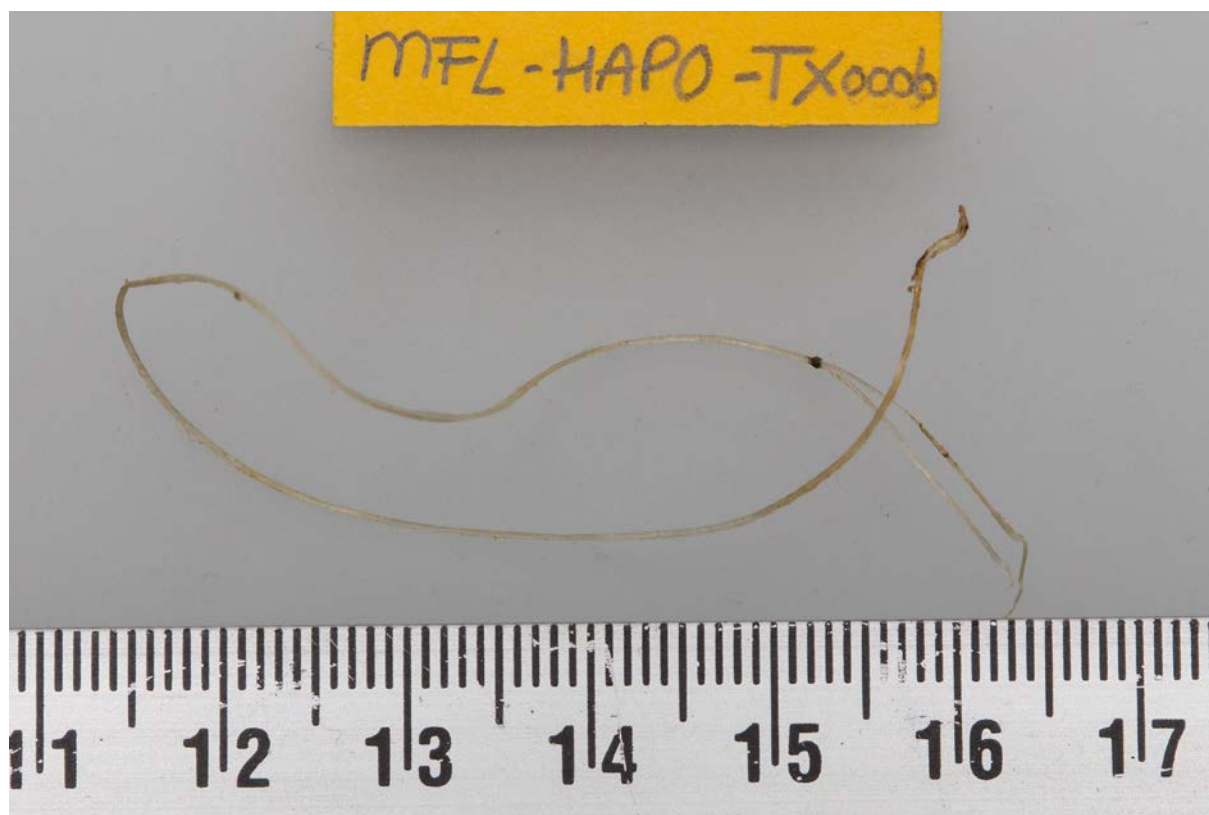

Thread PP (88%) Mass 0.0123 g

MFL-HAPO-TX0011

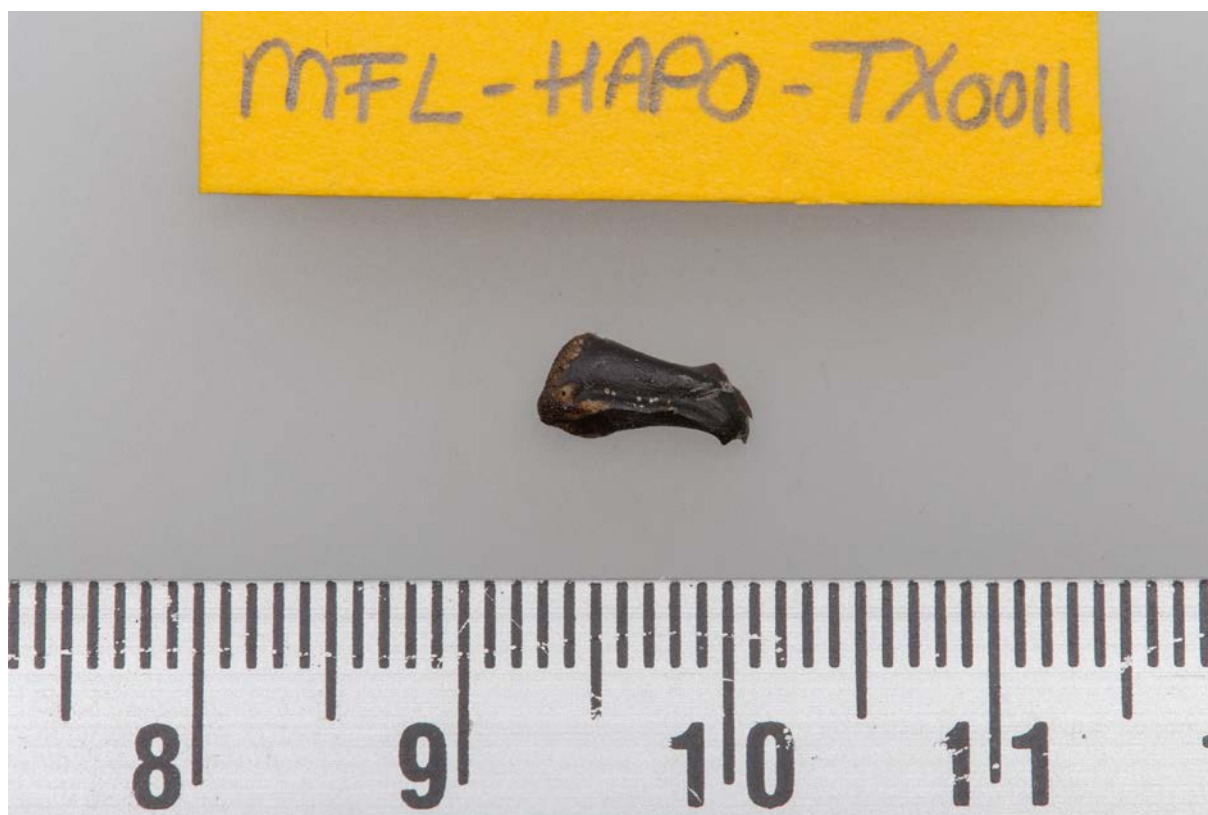

Fragment No ID (PA 72%) Mass 0.0196 g



**MFL-HAPO-TX0012**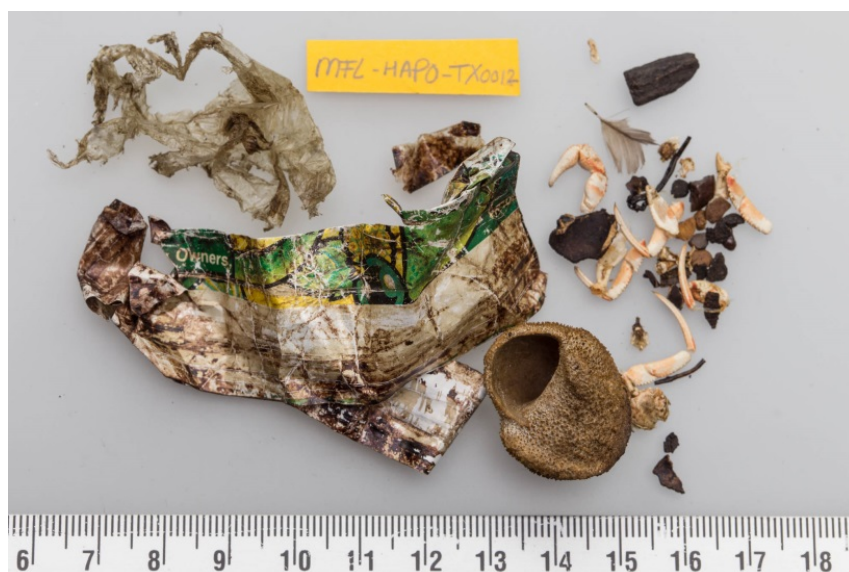

with natural items, a snail shell, hermite crab legs, feather and small pieces of bog-wood

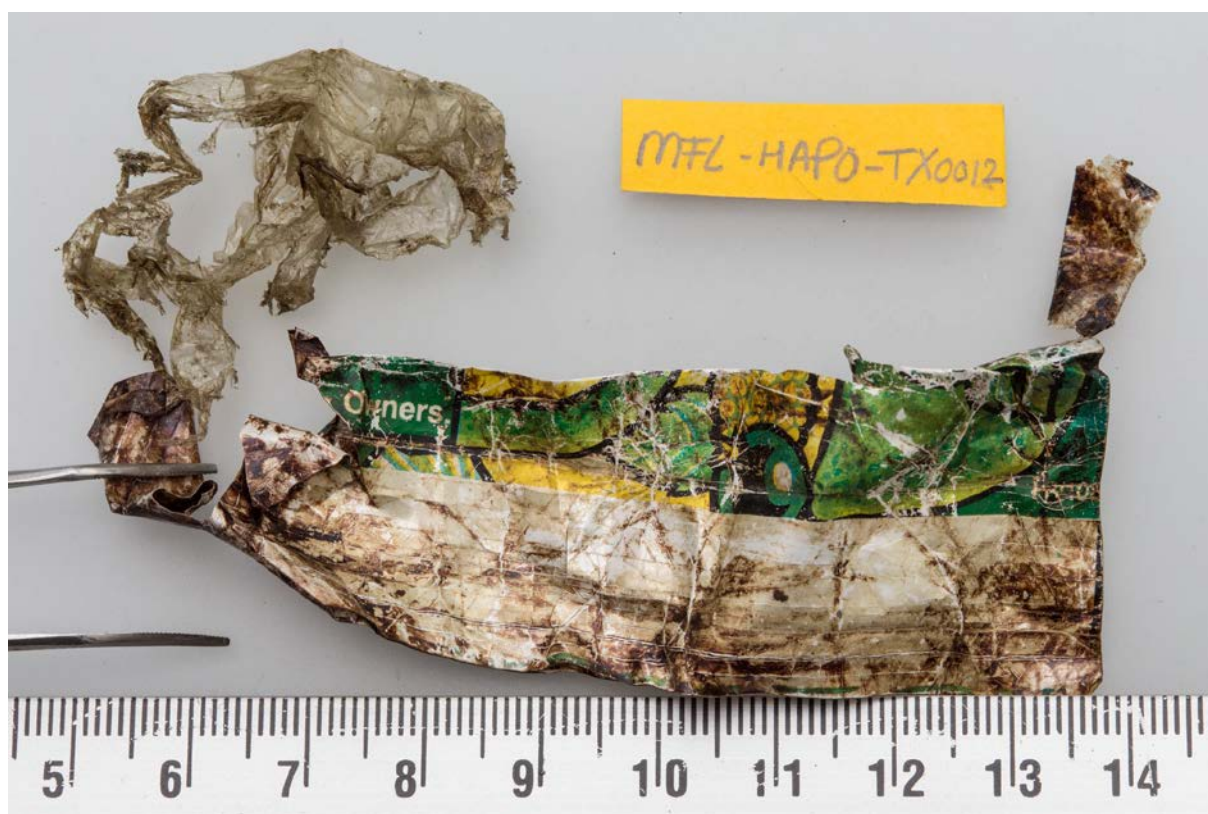

**Transparent top left sheet PE (81%) Mass 0.0262 g;**

**Printed bottom sheet No ID (PP 50%) Mass 0.1399 g;**

**Dark top right sheet PP (91%); Mass 0.0049 g**



## MFL-HAPO-TX0038

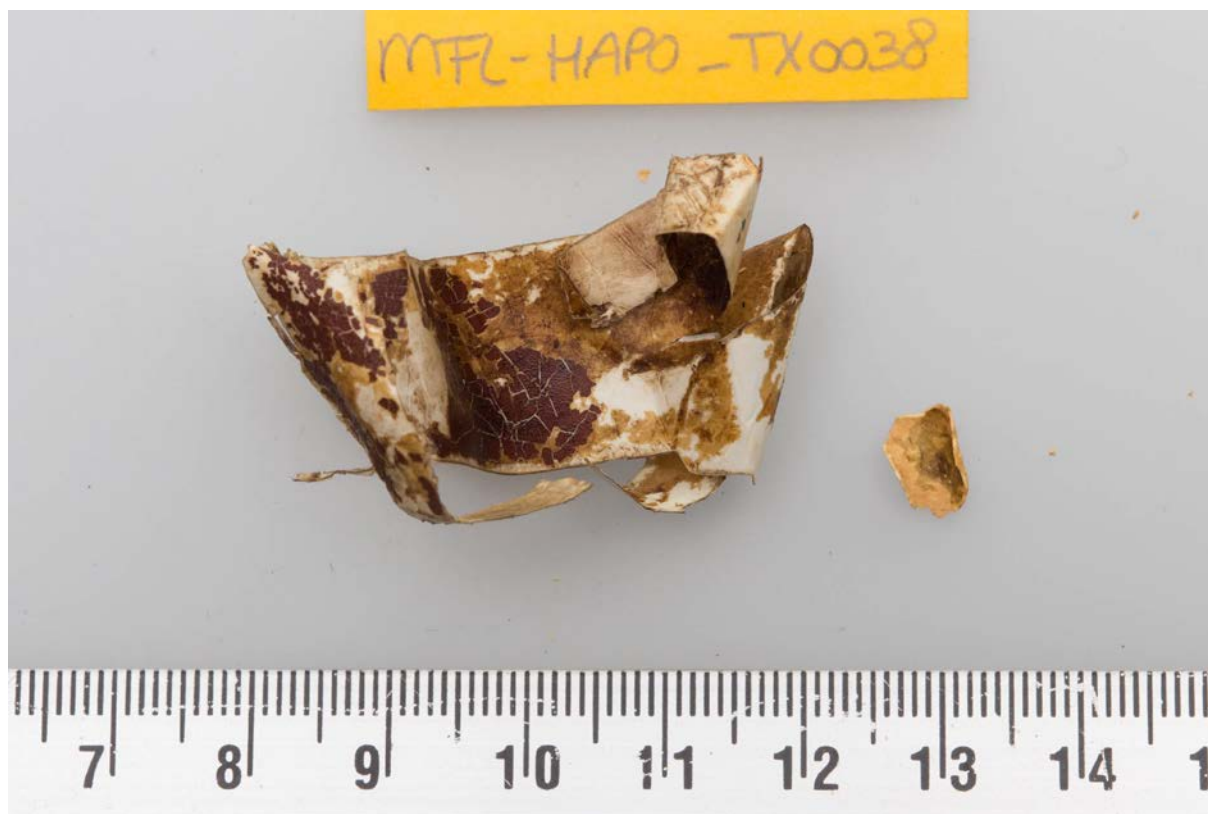

Sheet (left) No ID (PP 64%) Mass 0.1635 g;

other plastic (right) PVC (87%) Mass 0.0445 g

MFL-HAPO-TX0040

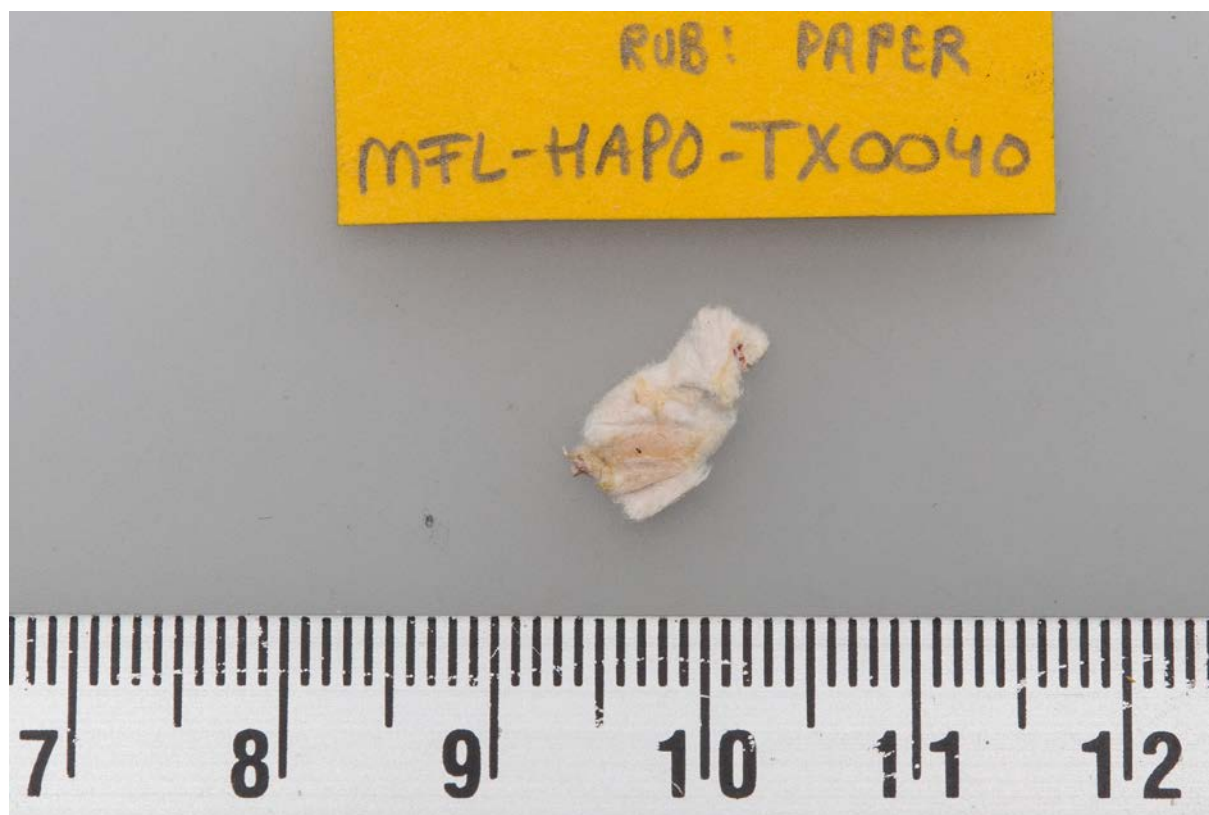

Not plastic but other rubbish:

Paper No ID (PET 68%) Mass 0.0051 g

MFL-HAPO-TX0049

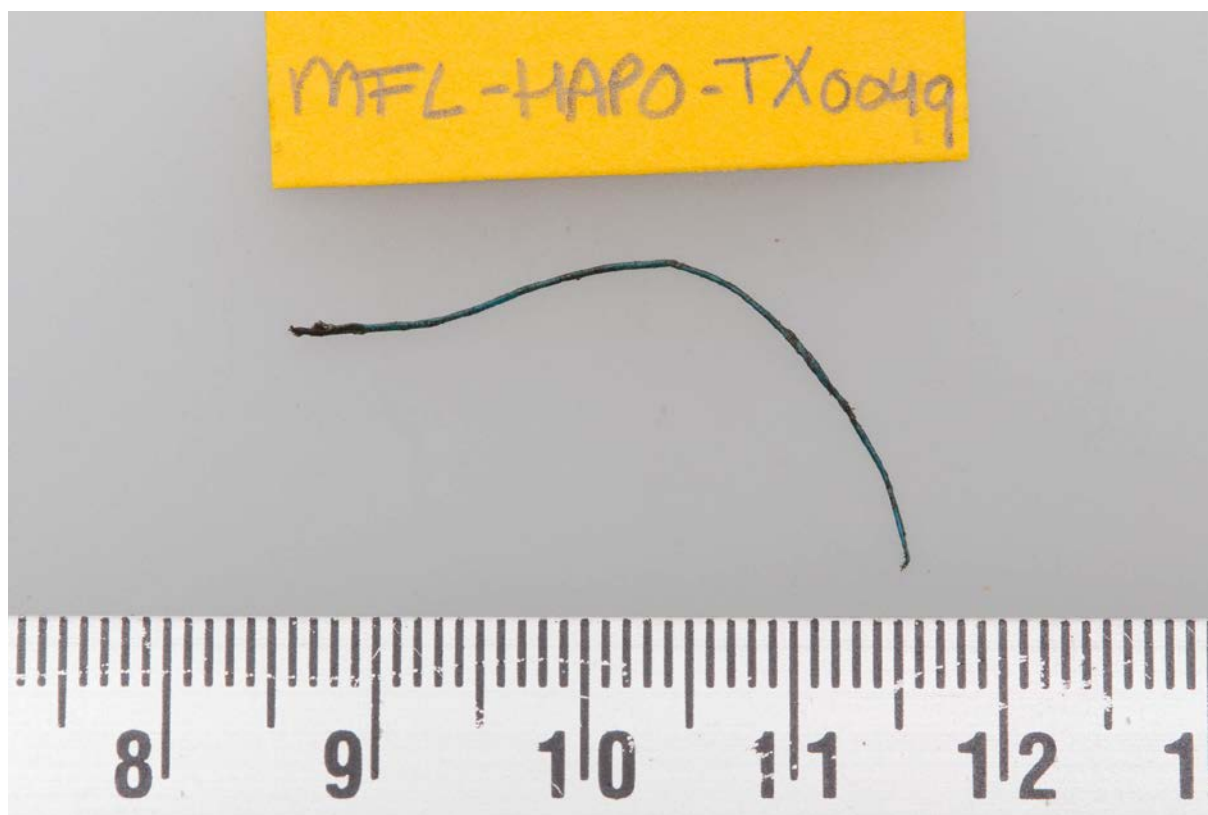

Thread PE (95%) Mass 0.0038 g

**MFL-HAPO-UT0101**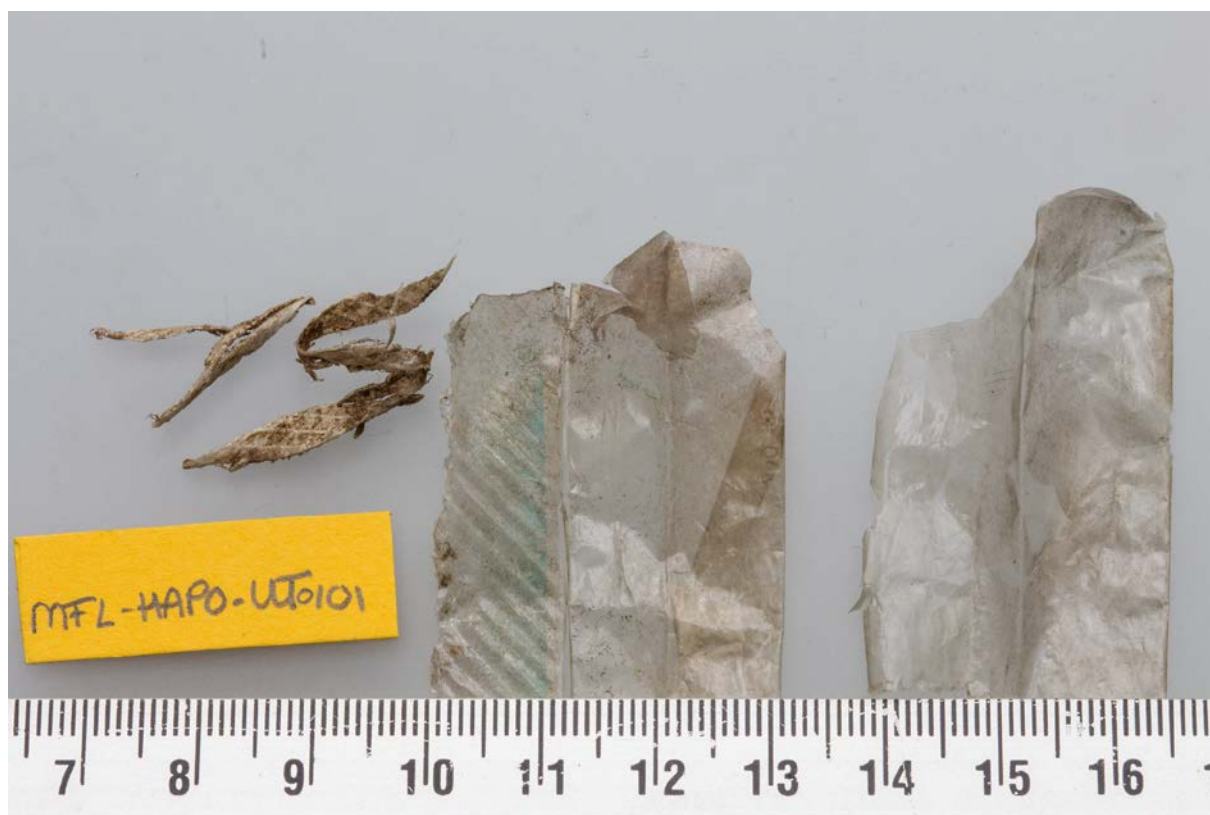

*From left to right:*

**Sheet PP (87%) Mass 0.0142 g;**

**Sheet PP (87%) Mass 0.0367 g;**

**Sheet PP (97%) Mass 0.0365 g;**

**Sheet PP (97%) Mass 0.0480 g**

**MFL-HAPO-UT0108**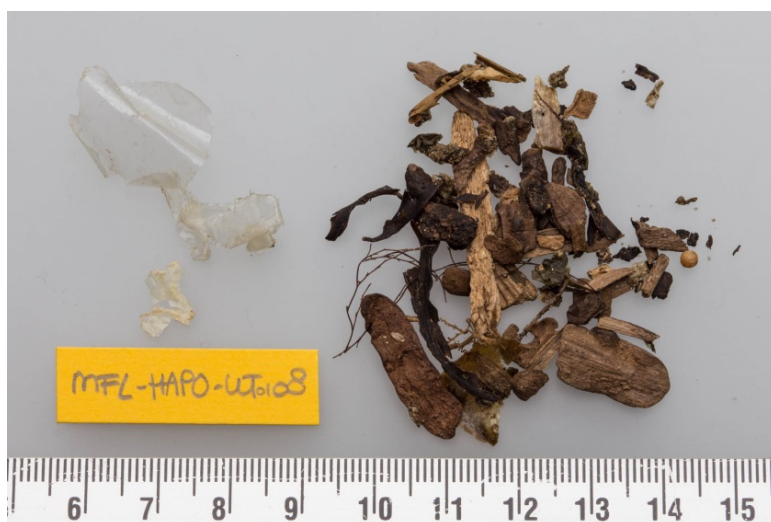

with natural items,  
mainly smaller pieces of bog-wood

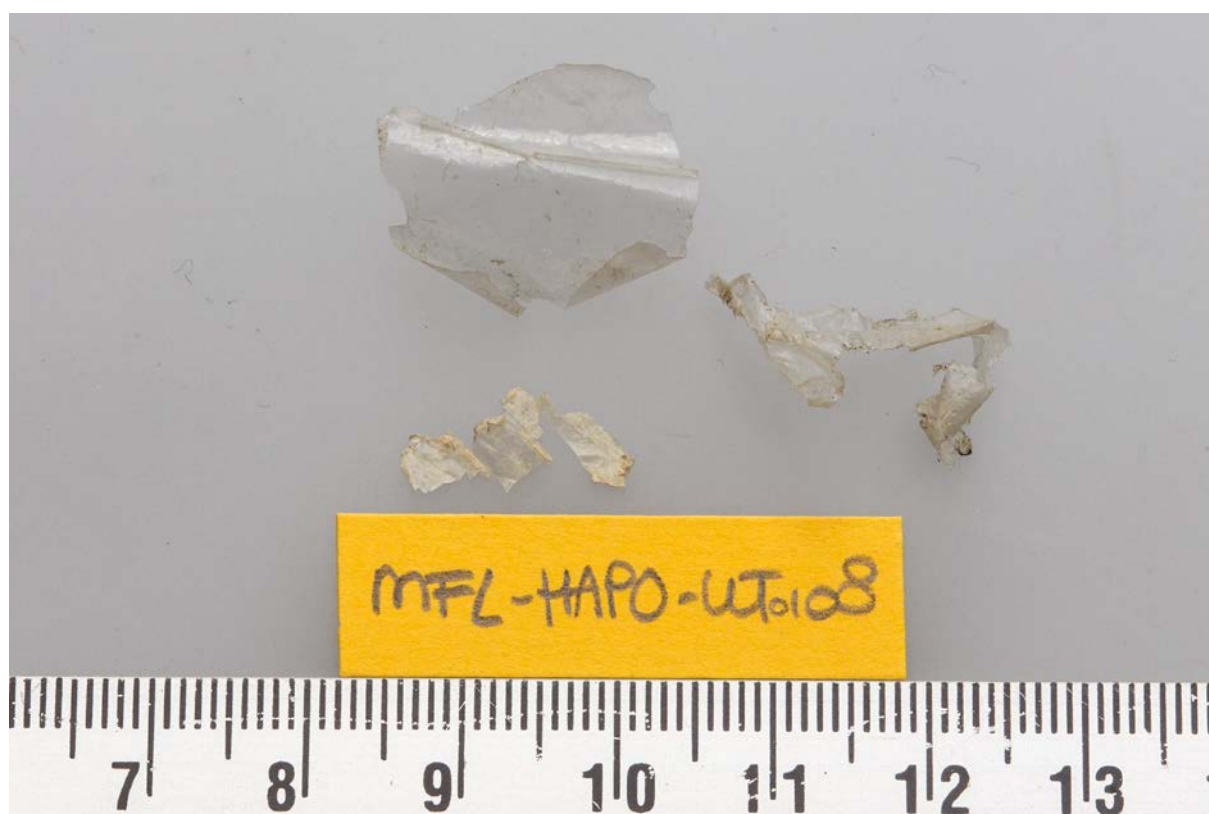

**Top left Sheet PP (87%) Mass 0.0108 g;**

**Sheet bottom left No ID (PA 64%) Mass 0.0010 g;**

**Sheet bottom centre No ID (PA 64%) Mass 0.0001 g;**

**Bottom right Sheet PE (88%) Mass 0.0039 g**



**MFL-HAPO-UT0122**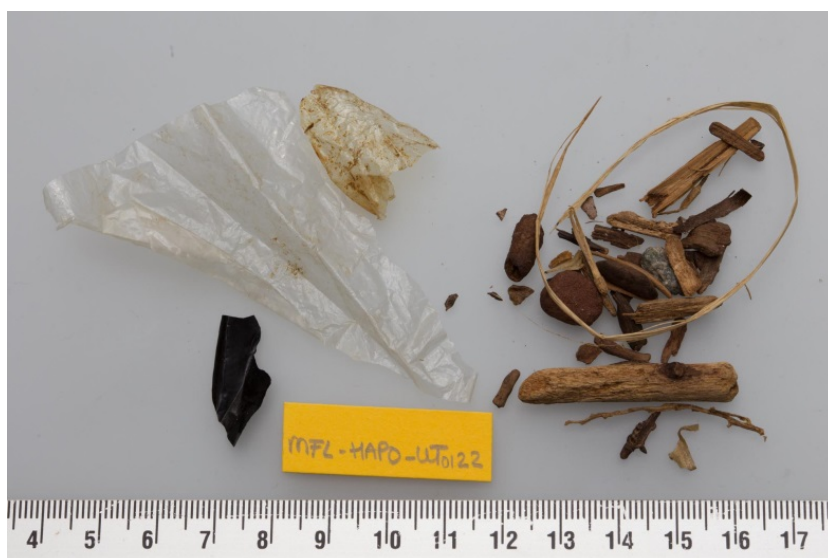

with natural items,  
mainly smaller pieces of bog wood

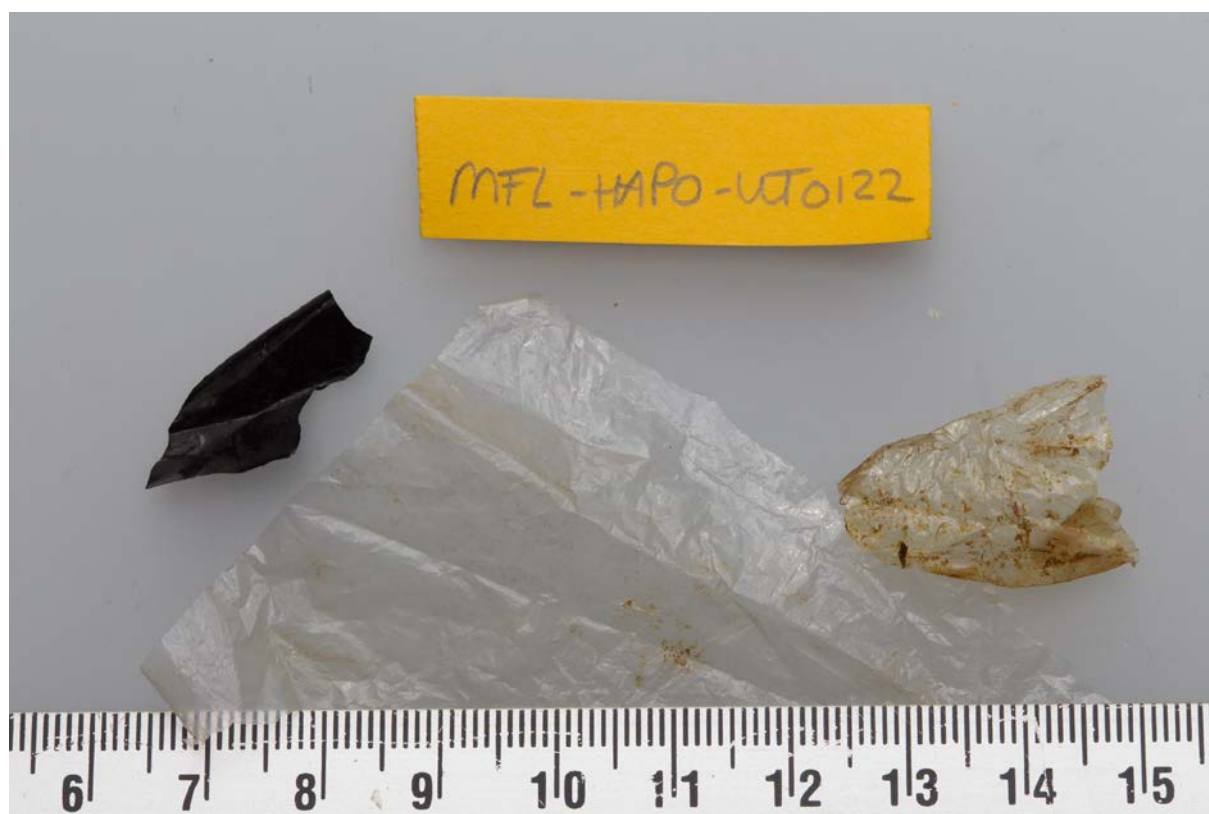

**From left to right:**

**Sheet No ID (PS 15%) Mass 0.1510 g;**

**Sheet PET (89%) Mass 0.0524 g;**



Sheet PVC (87%) Mass 0.0200 g

MFL-HAPO-UT0145

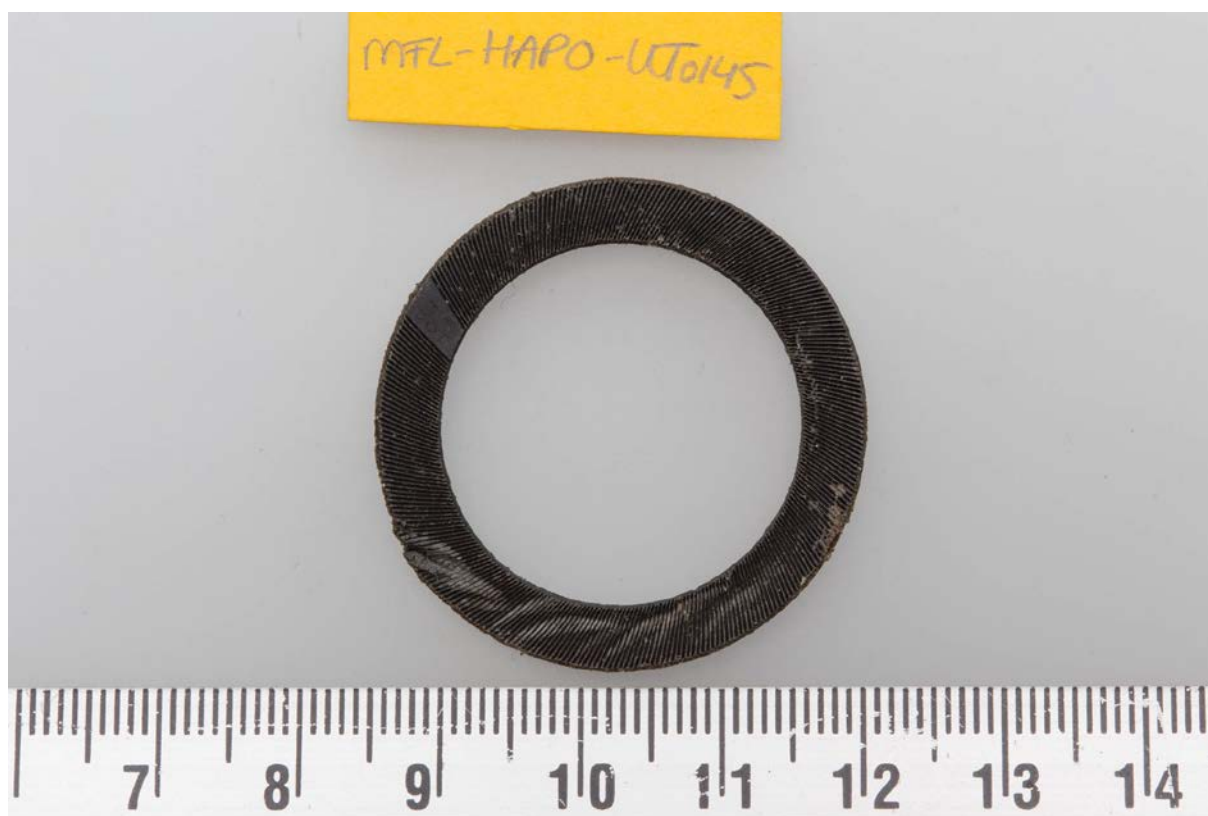

Other Plastic (*large rubbery like synthetic washer*)

no ID (PS 11%) Mass 0.3138 g

**MFL-HAPO-UT0151**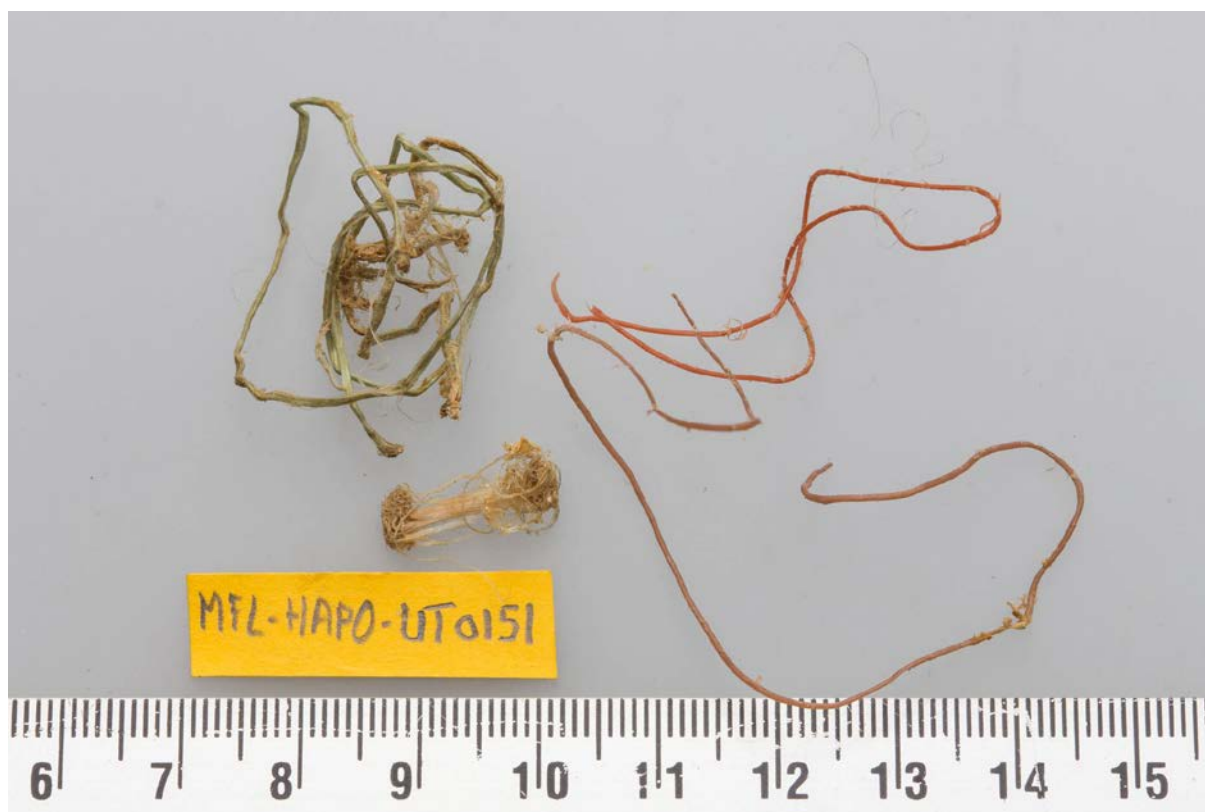

**Top left thread PA (84%) Mass 0.0415 g;**

**Top left thread (entangled with previous) PP (92%) Mass 0.0344 g;**

**top right thread PE (97%) Mass 0.0168 g;**

**Bottom left thread PA (83%) Mass 0.0217 g;**

**Bottom right thread PE (92%) Mass 0.0304 g**

**MFL-HAPO-UT0153**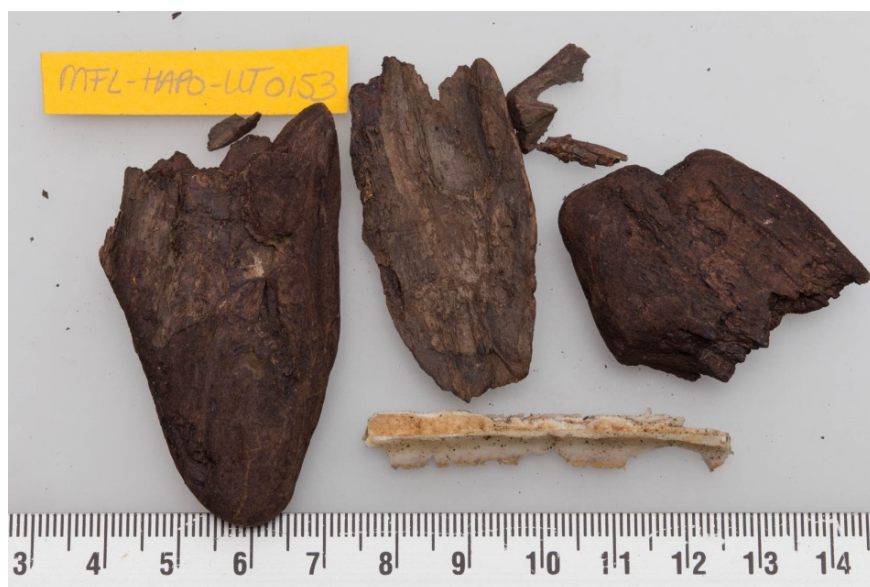

with natural items,  
large pieces of bog wood

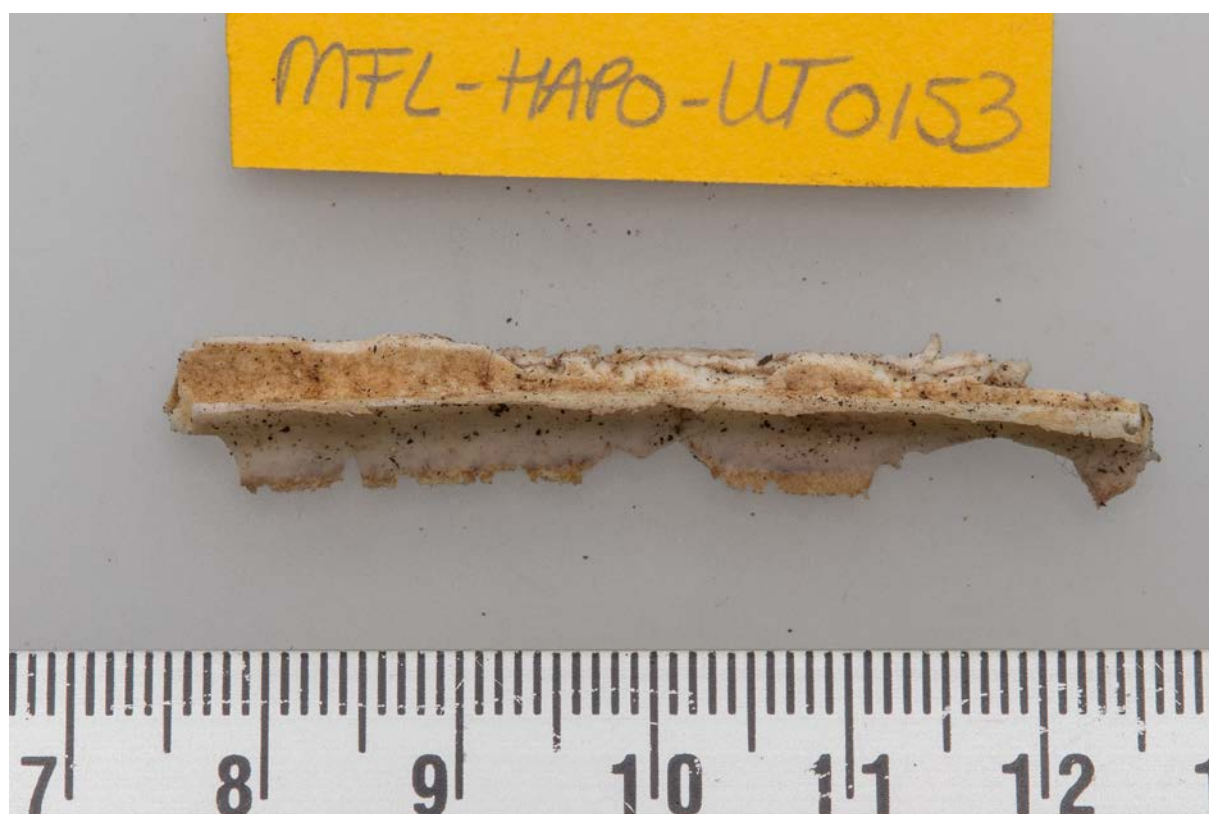

Other plastic No ID (POM 60%) Mass 0.6086 g

MFL-HAPO-UT0164

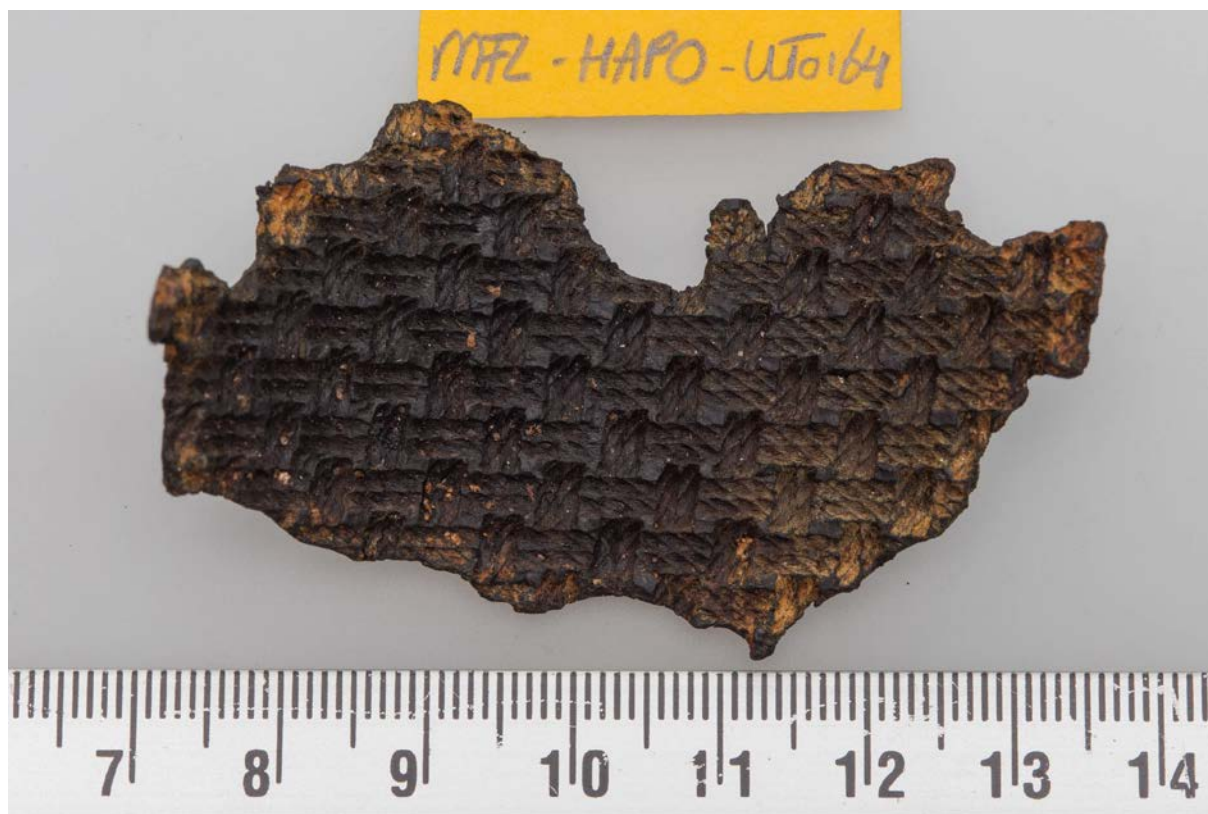

Other plastic No ID (PS 14%) Mass 2.5722 g

MFL-HAPO-UT0177

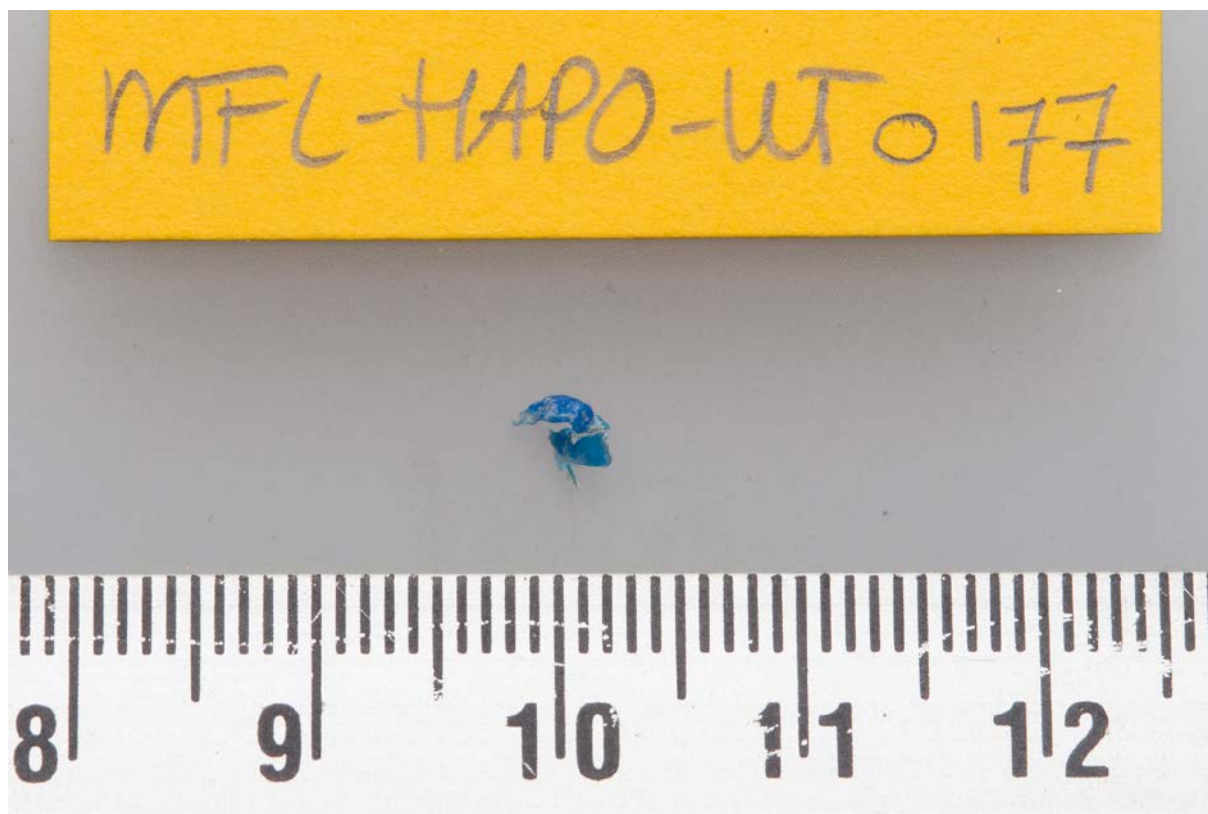

Fragment PE (98%) Mass 0.0037 g



## MFL-HAPO-UT0180

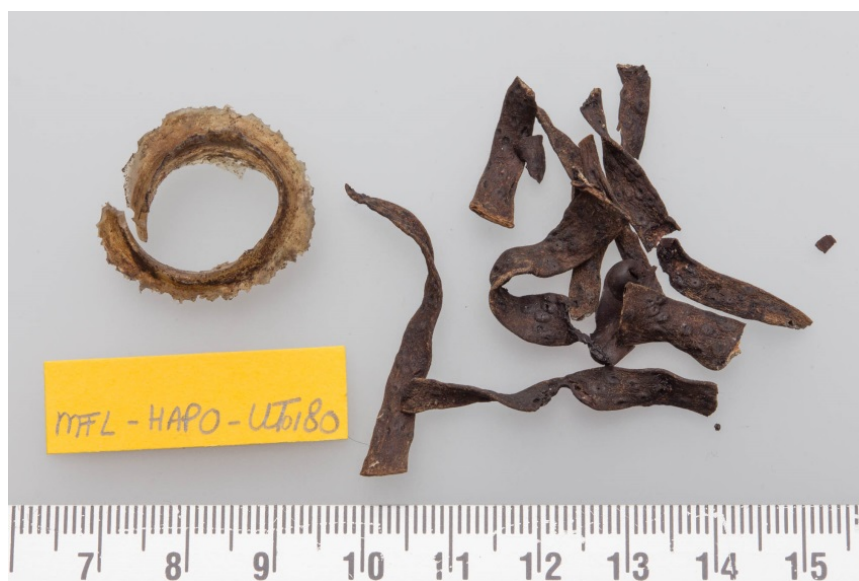

with natural items  
seaweed

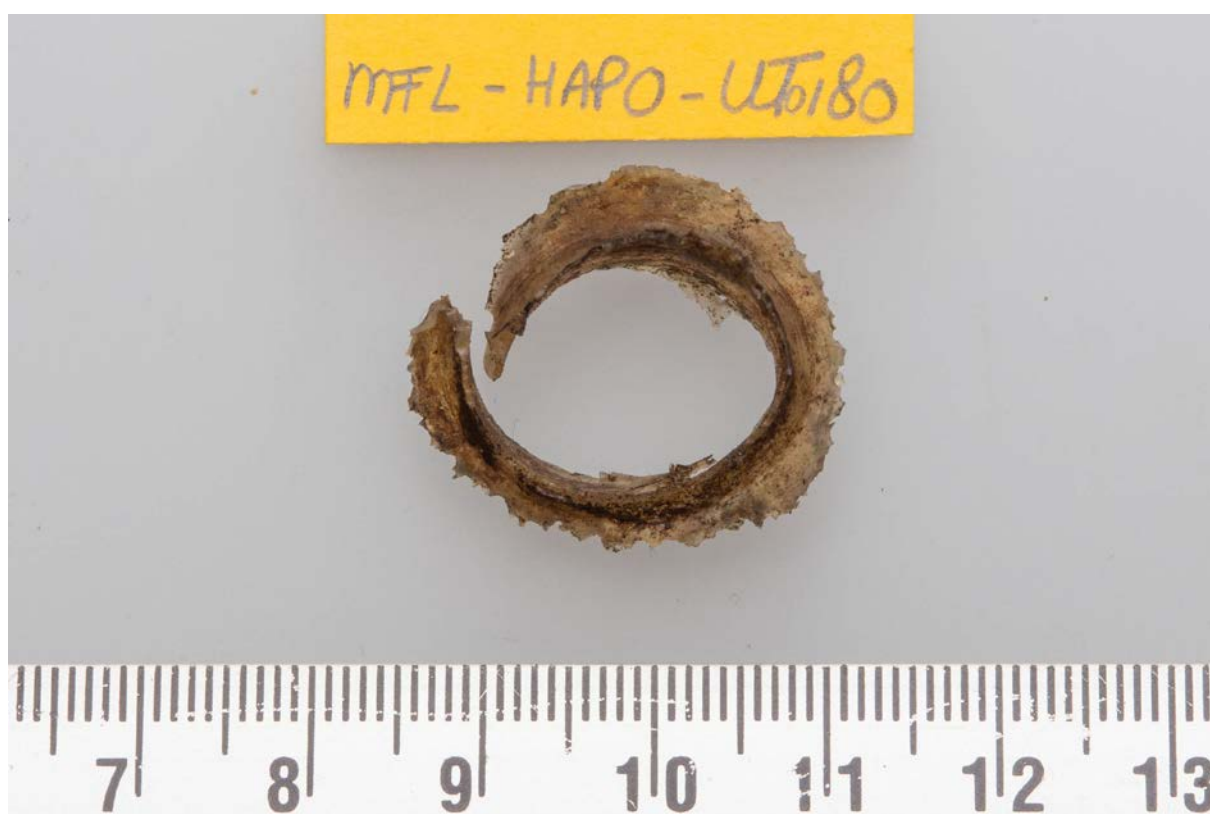

Other plastic No ID (POM 60%) Mass 0.6596 g



MFL-HAPO-UT0193

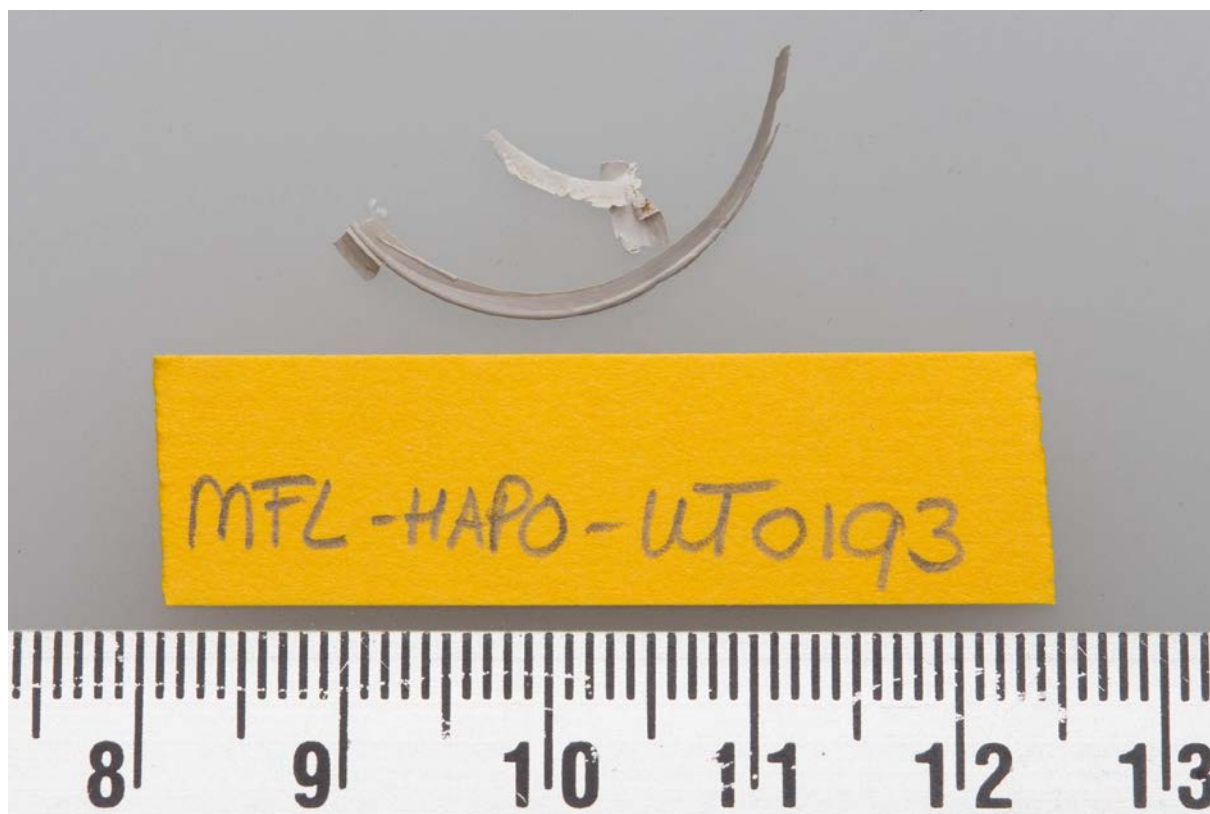

Fragment No ID (PSO 63%) Mass 0.0059 g

MFL-HAPO-UT0197

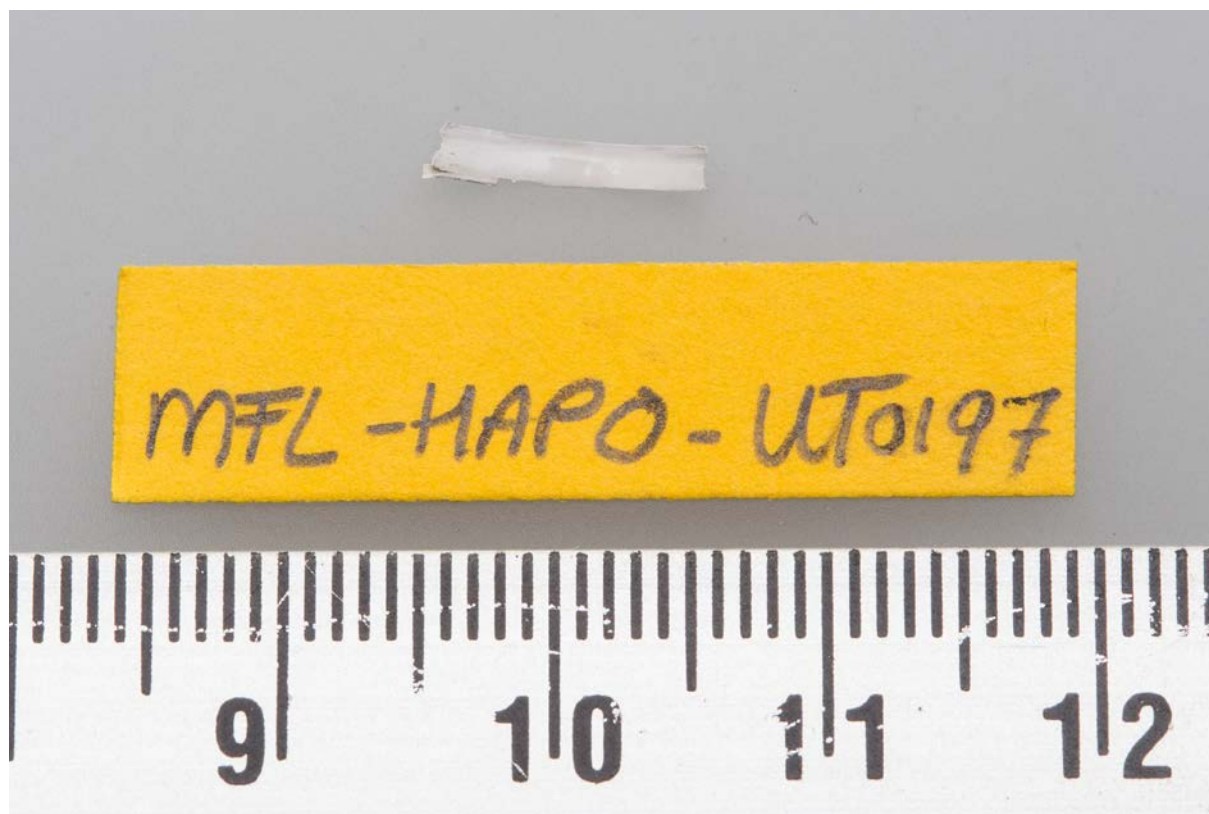

Fragment No ID (PET 72%) Mass 0.0023 g

MFL-HAPO-UT0201

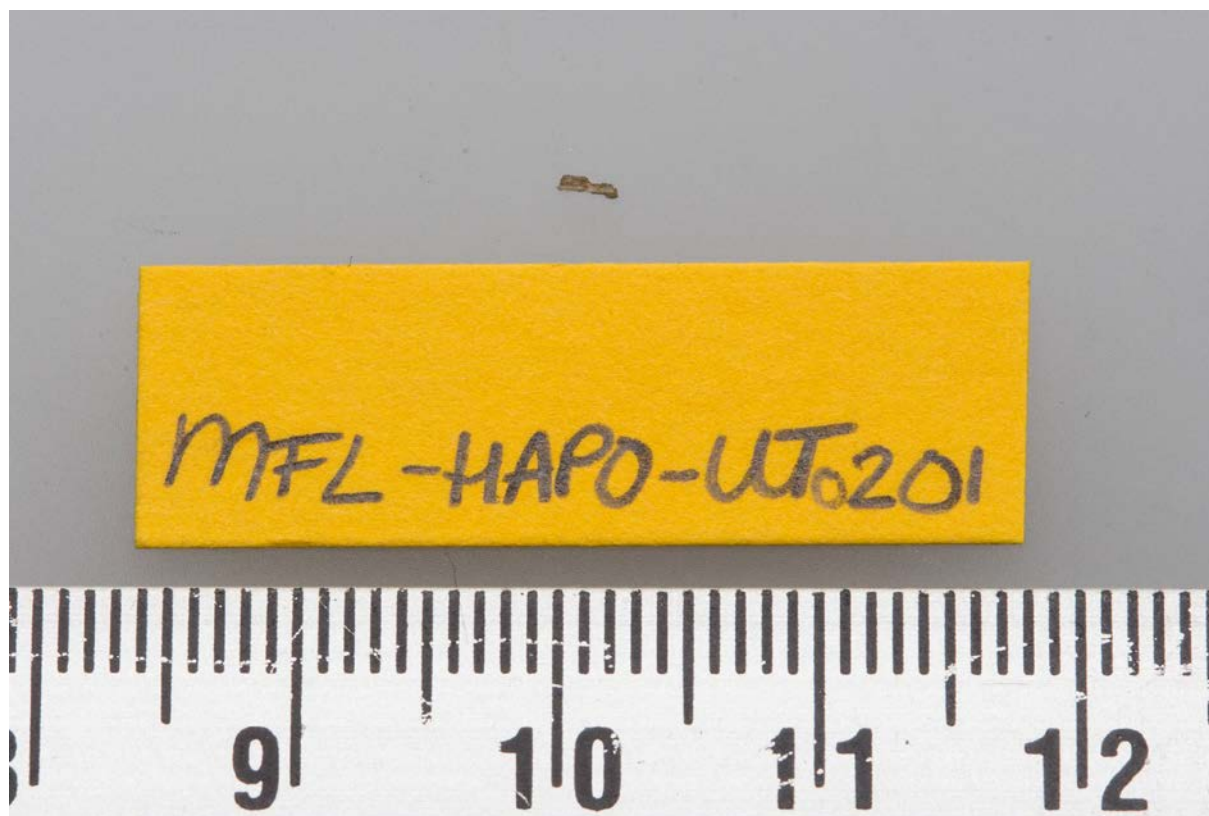

Fragment No ID (PA/ABS 46%) Mass 0.0003 g

**MFL-HAPO-UT0208**

**no photo, because sample lost**

**(1 sheet estimated 0.001 g)**

**No NIR analysis done**

**MFL-HAPO-UT0210**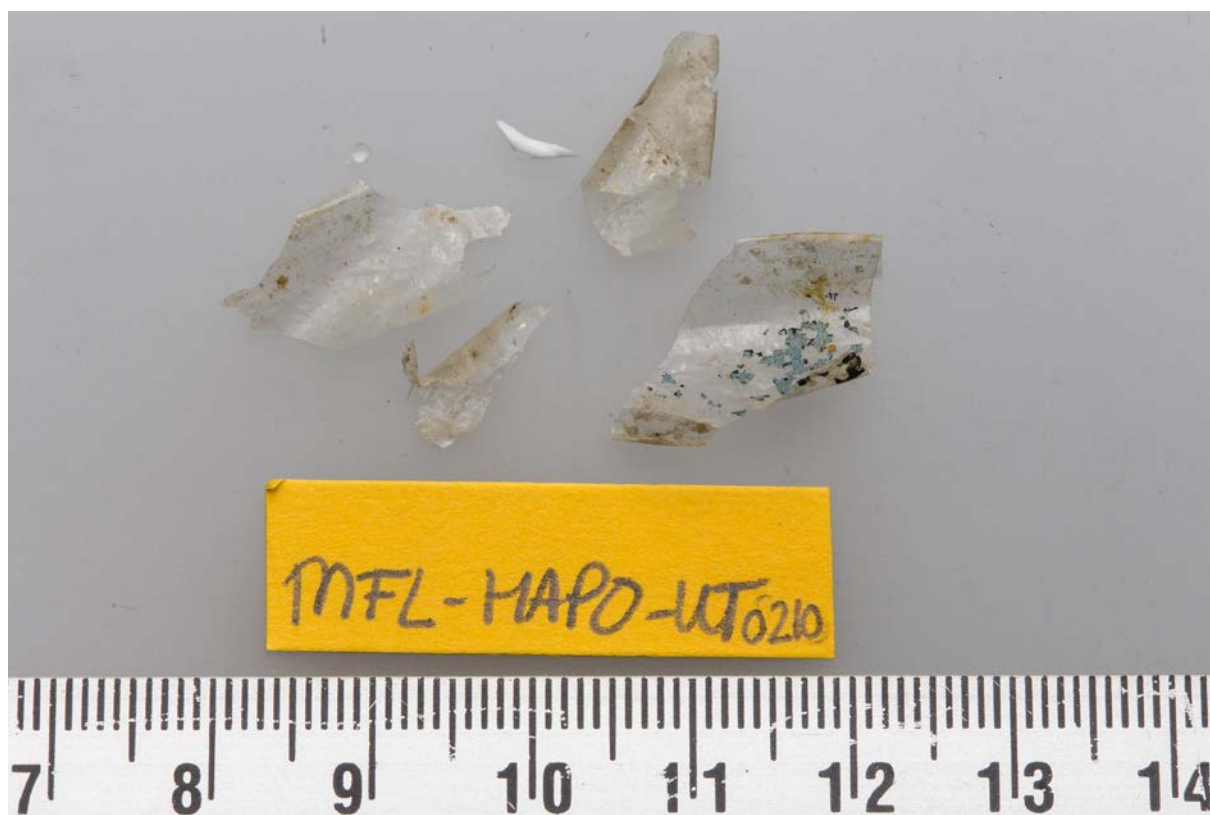

**Top left sheet PP (90%) Mass 0.0035gr;**

**Top right sheet PP (91%) Mass 0.0040 g;**

**Bottom left sheet PP (89%) Mass 0.0015 g;**

**Bottom right sheet PP (92%) Mass 0.0063 g**

**MFL-HAPO-UT0221**

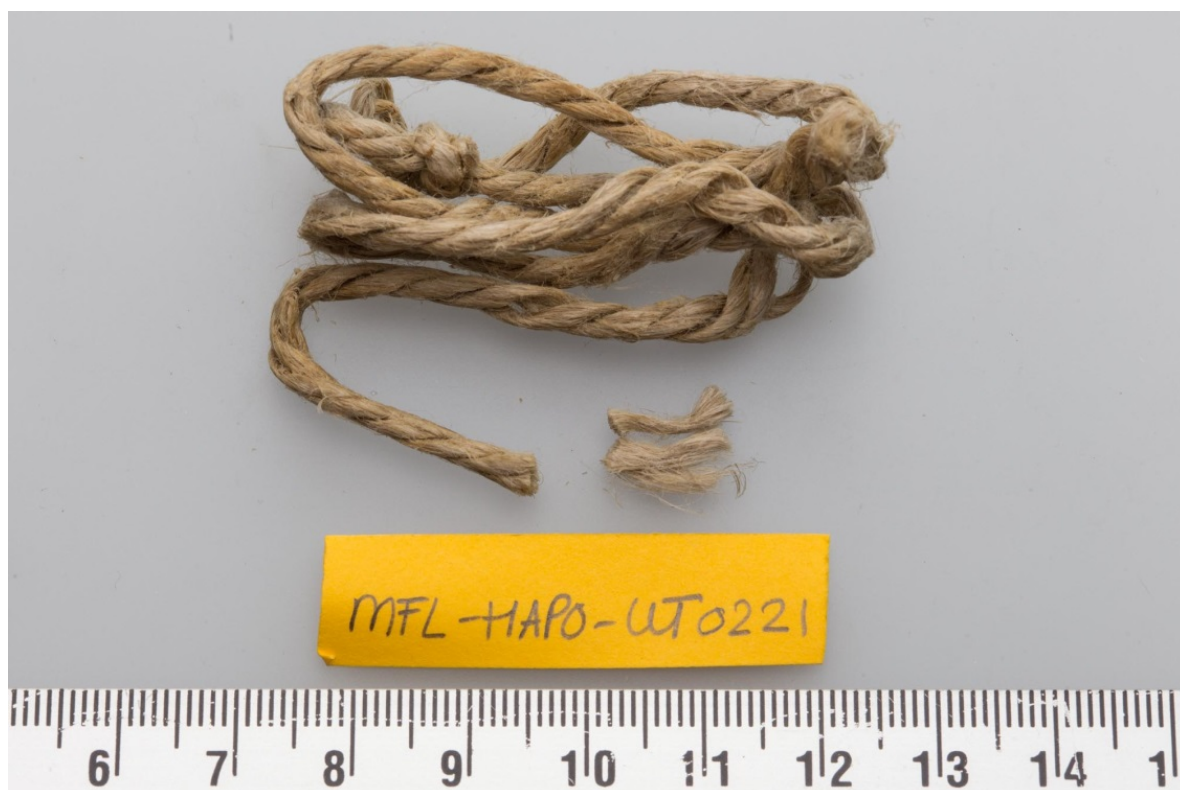

**Other rubbish: Non-synthetic rope (broken during processing) No ID (PA 46%) Mass 1.1426 g**



MFL-HAPO-UT0232

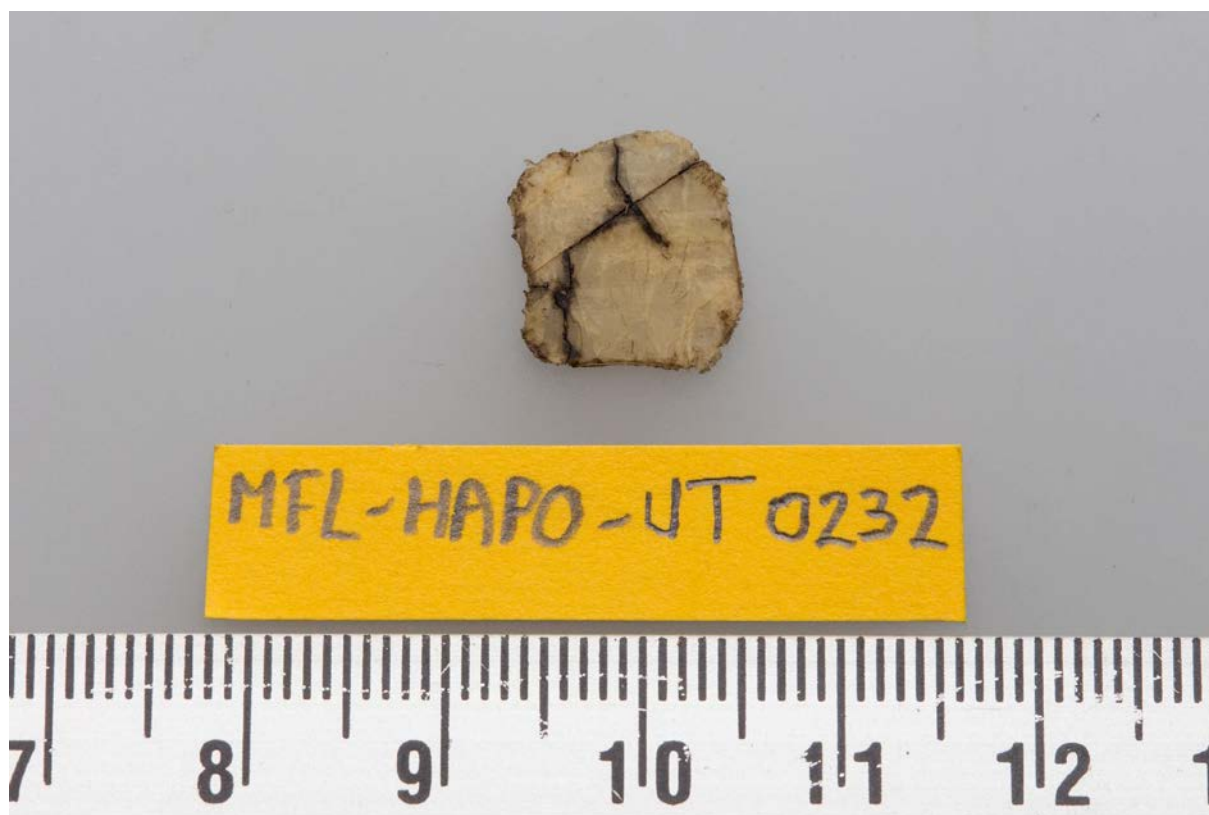

No NIR analysis done (*glass fibre like appearance*)

MFL-HAPO-UT0238

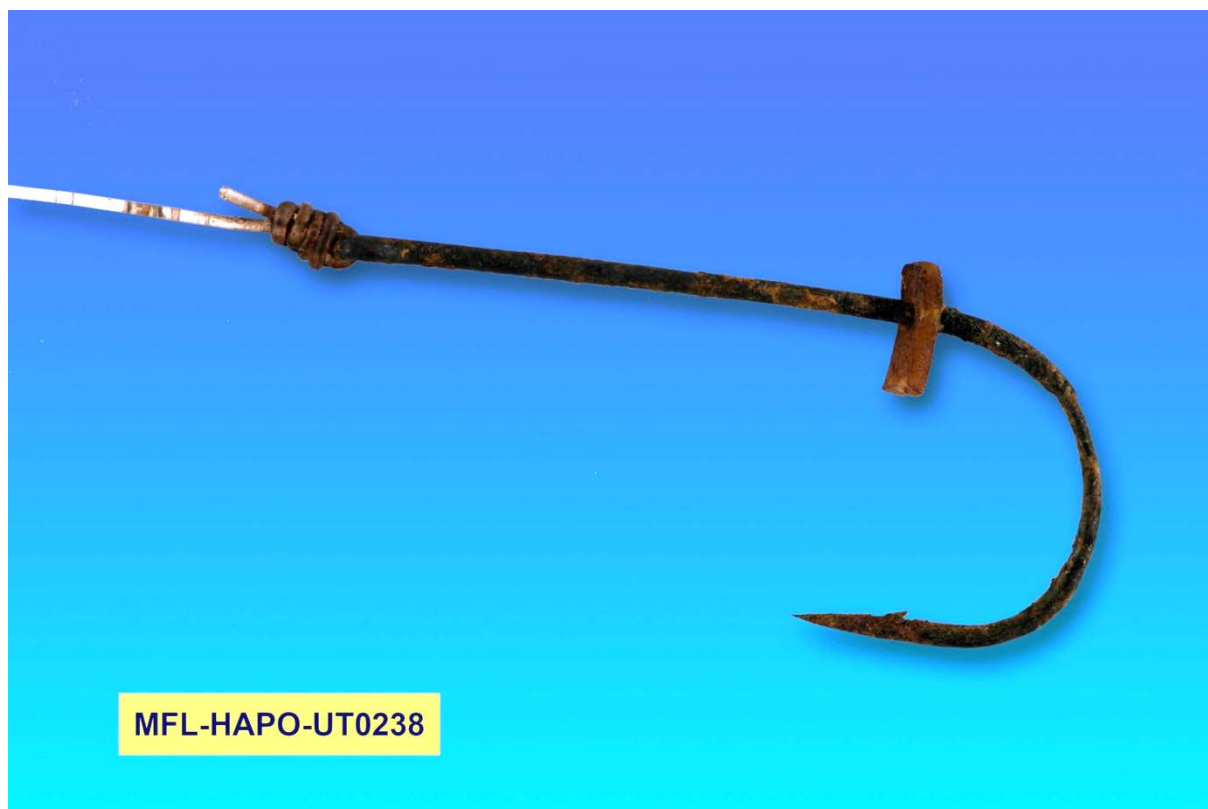

This item was recorded as both plastic for the nylon thread as under other rubbish for the metal hook. No NIR analysis done

MFL-HAPO-UT0348

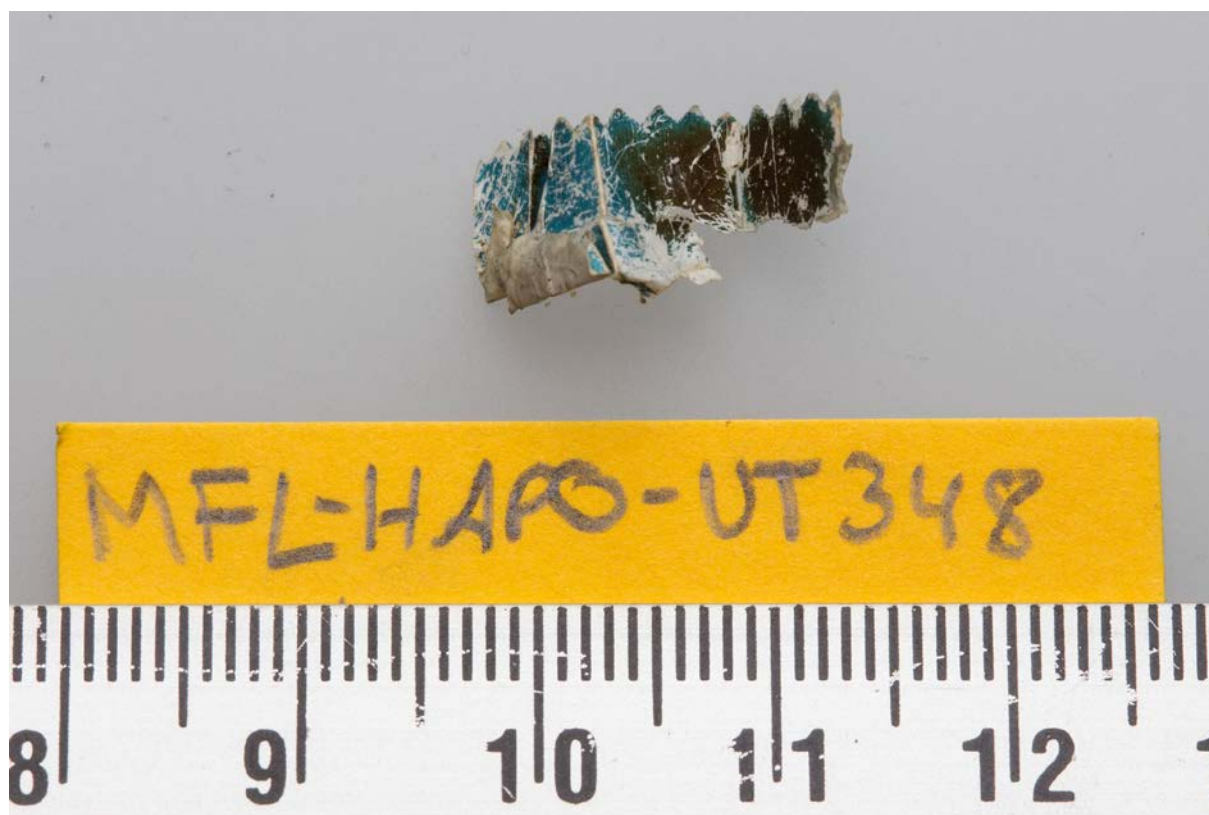

No NIR analysis done Mass 0.0114 g

**MFL-HAPO-UT0360**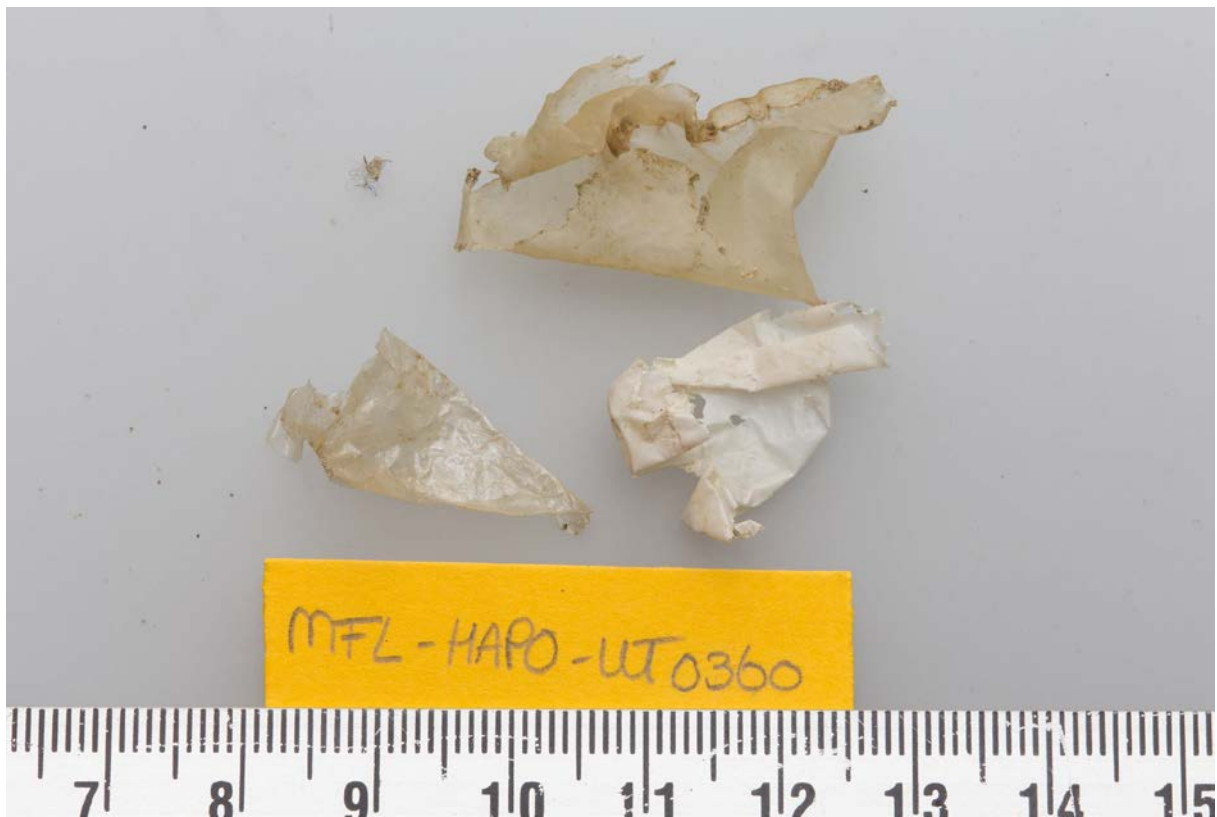

**Top left thread No ID (PET 54%) Mass 0.0004;**

**Top right sheet PE (94%) Mass 0.0894 g;**

**Bottom left sheet No ID (PA 67%) Mass 0.0083 g;**

**Bottom right sheet PE (89%) Mass 0.0123 g**

**MFL-HAPO-UT0384**

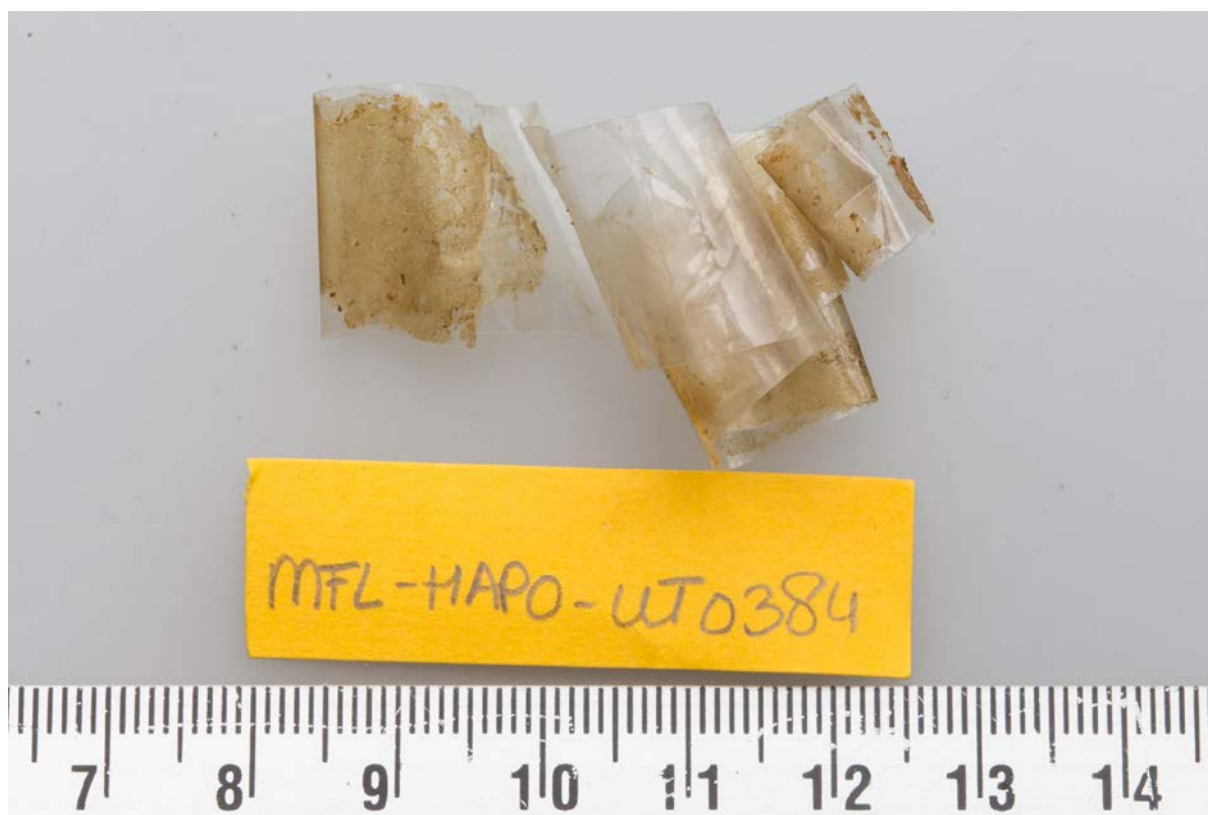

**Sheet PP (90%) Mass 0.0083 g**

**MFL-HAPO-UT0413**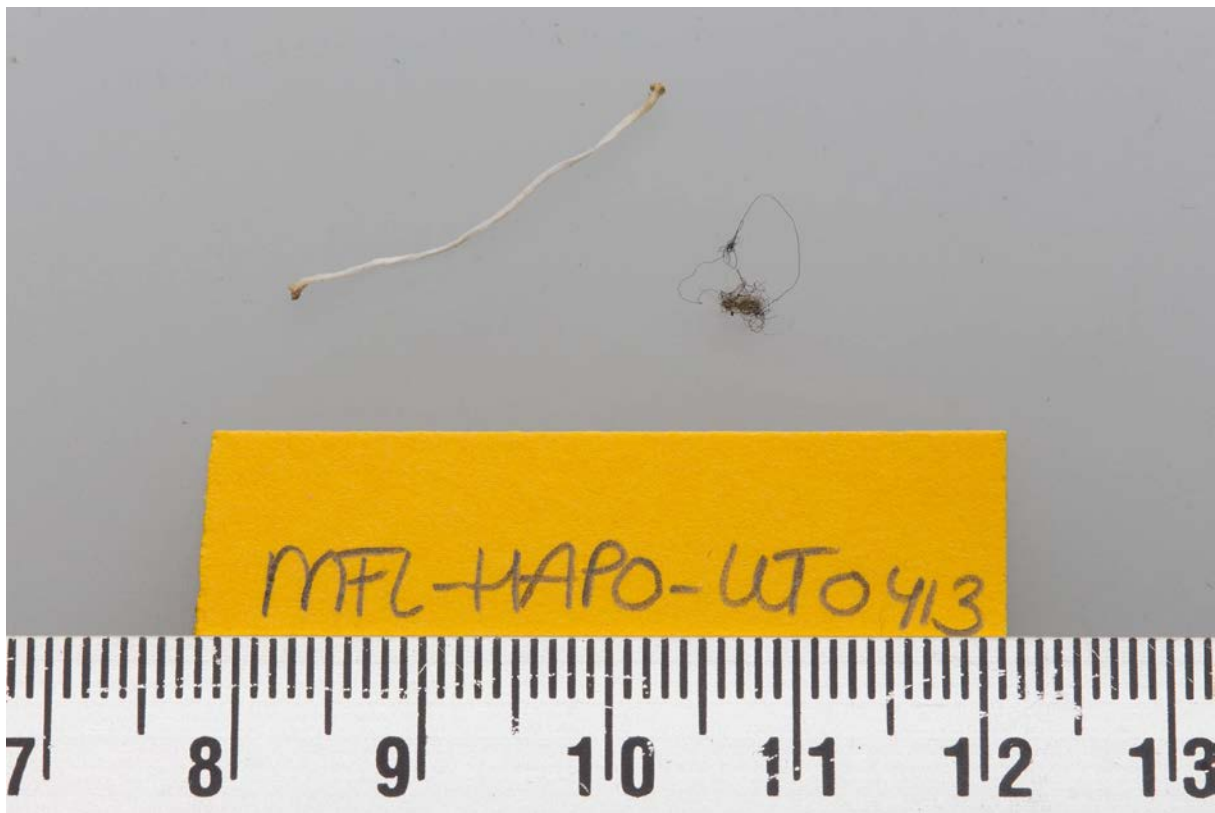

Left thread detected during overflow for the diet study; ball of threads (fibres) only detected later during analysis of the sieved remains.

Left thread PE (95%) Mass 0.0021 g;

right thread No ID (PA 46%) Mass 0.0001 g



MFL-HAPO-UT0435

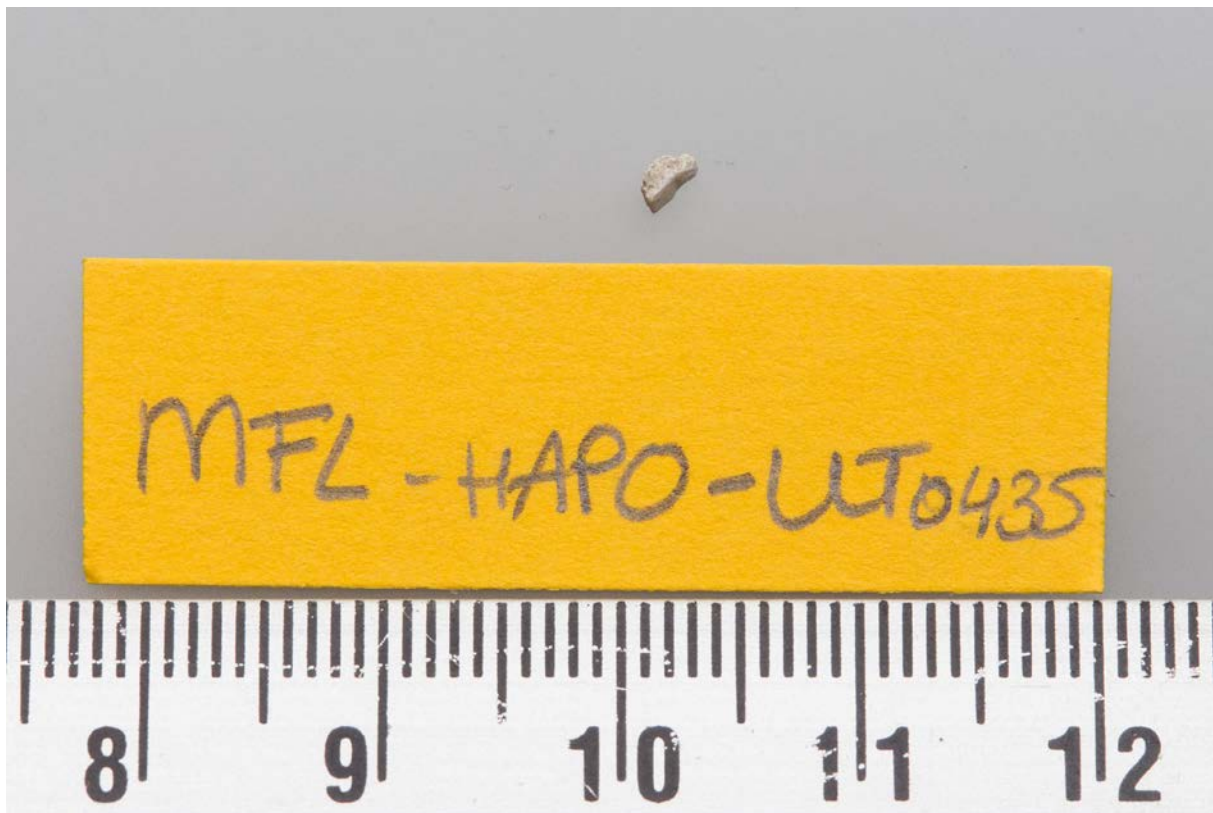

No plastic detected during the diet overflow procedure; this item found in the sieved remains.

Fragment No ID (PA 73%) Mass 0.0074 g

MFL-HAPO-UT0444

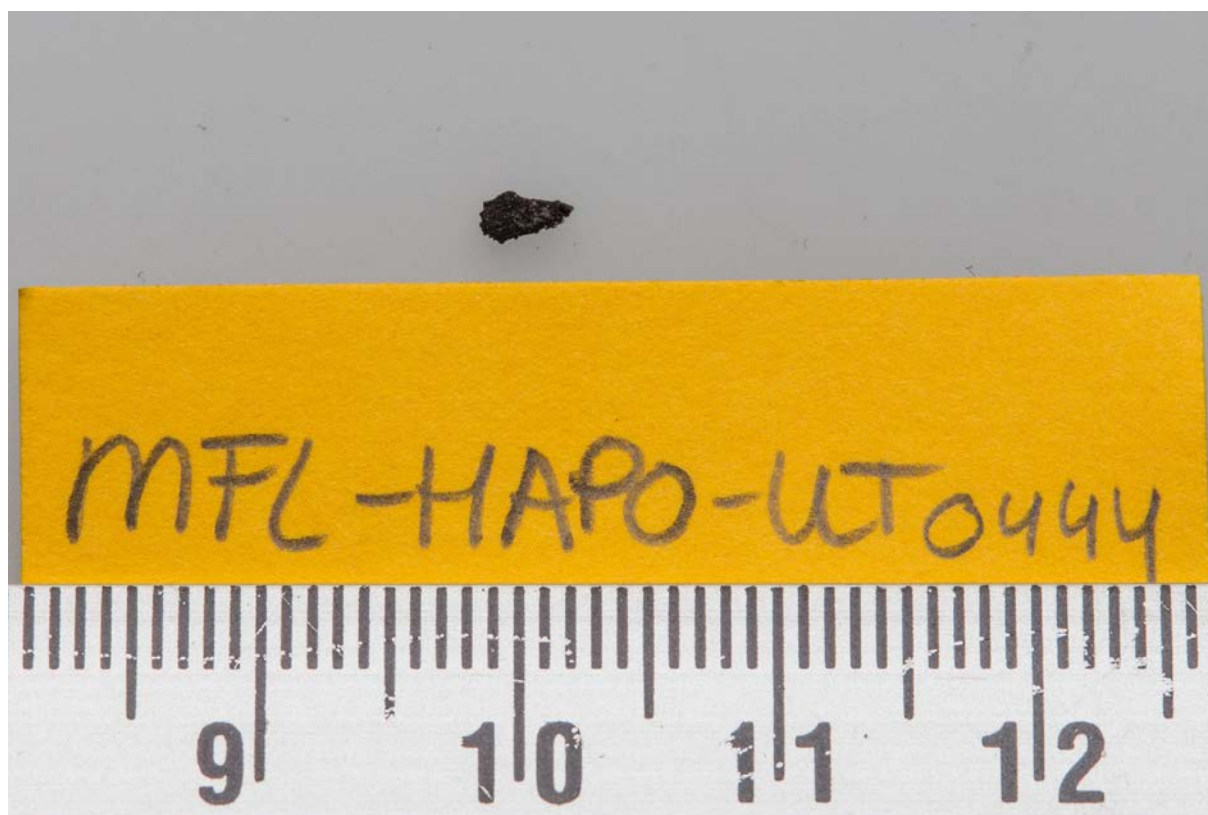

Fragment No ID (PA 69%) Mass 0.0037

MFL-HAPO-UT0471

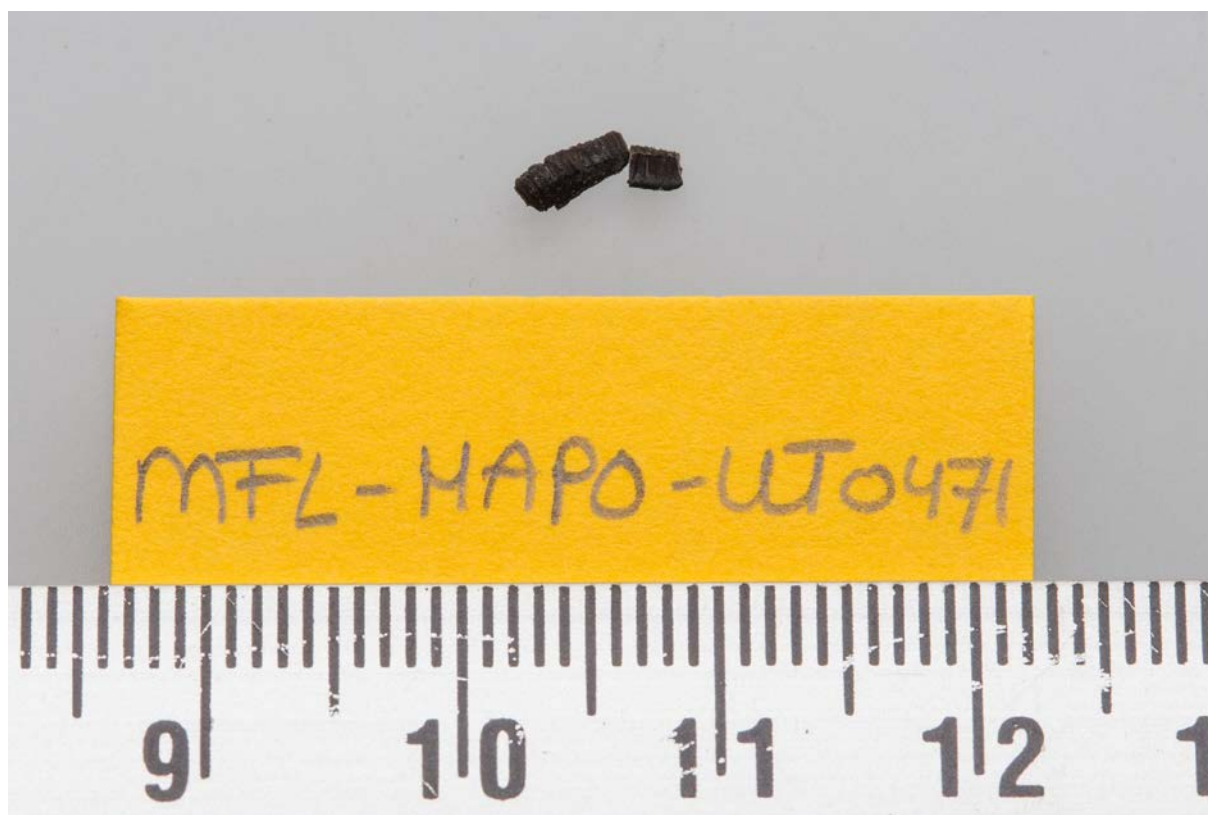

Fragment No ID (PA/ABS 68%) Mass 0.0071 g

MFL-HAPO-UT0510

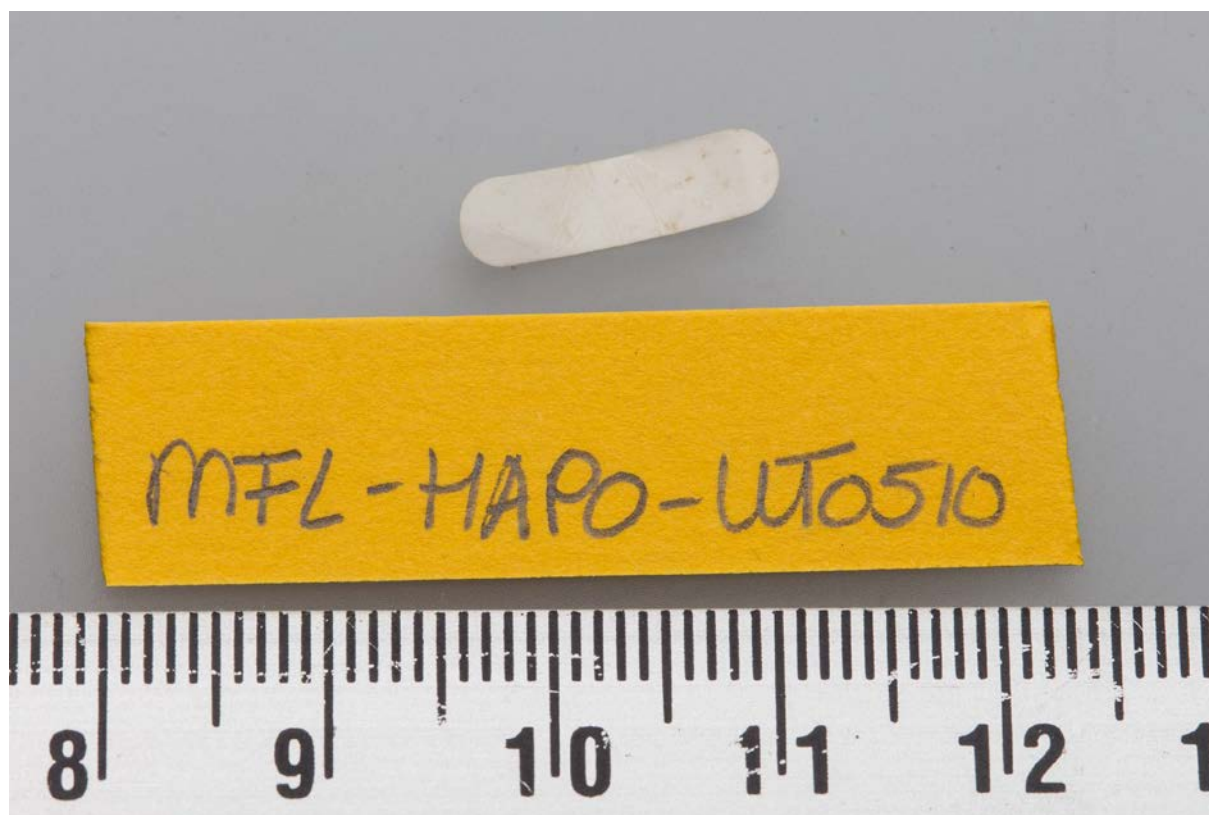

Sheet No ID (PP 56%) Mass 0.0041

MFL-HAPO-UT0511

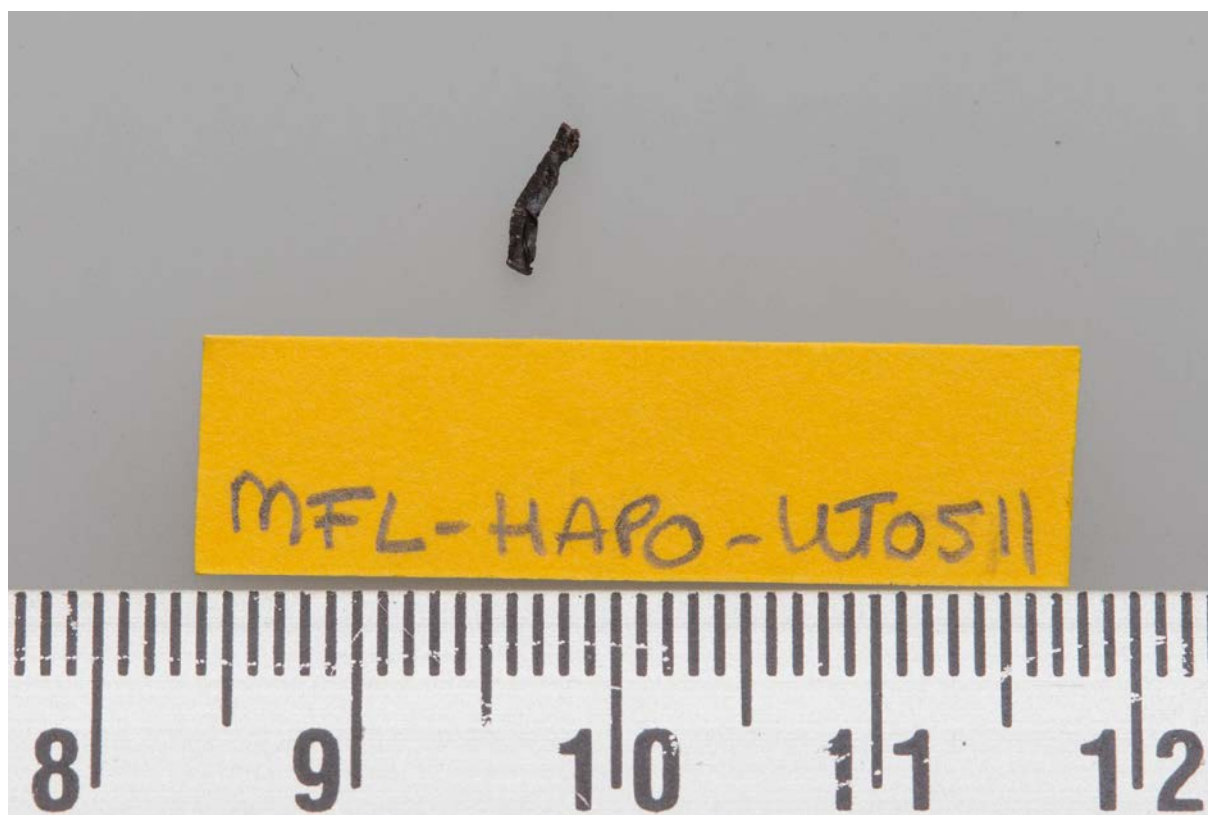

Fragment No ID (PA 68%) Mass 0.0013 g

**MFL-HAPO-UT0516**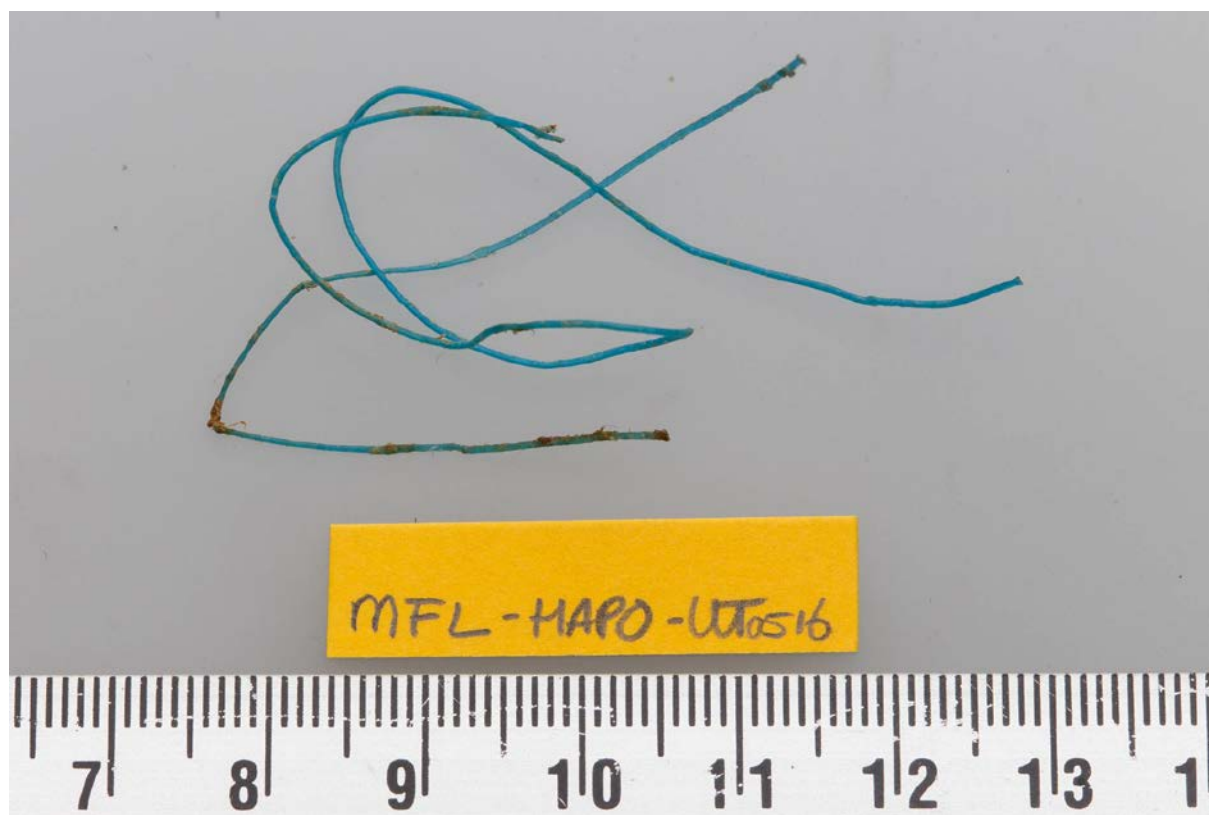

**Left thread PE (94%) Mass 0.0104 g;**

**Right thread PE (95%) Mass 0.0231 g**



**MFL-HAPO-UT0532**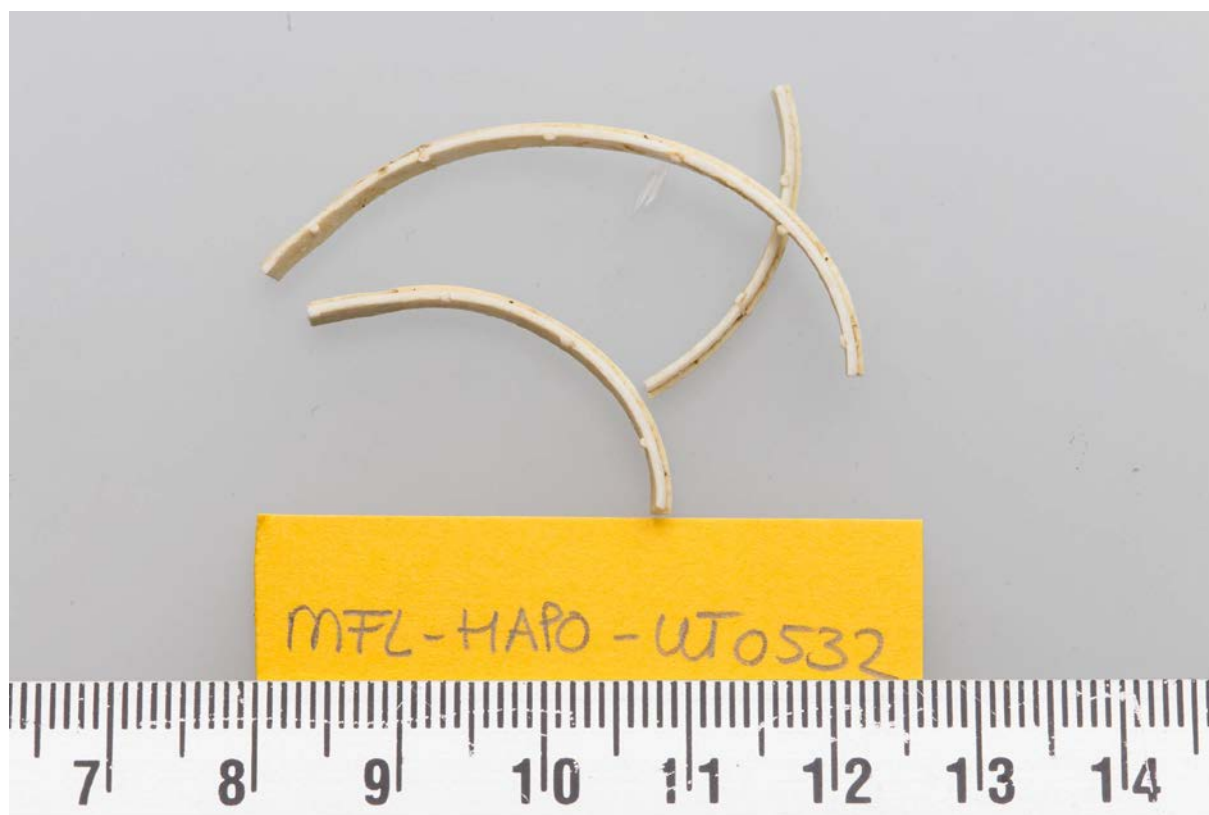

**Fragment PE (95%) Mass 0.2457 g**

MFL-HAPO-UT0605

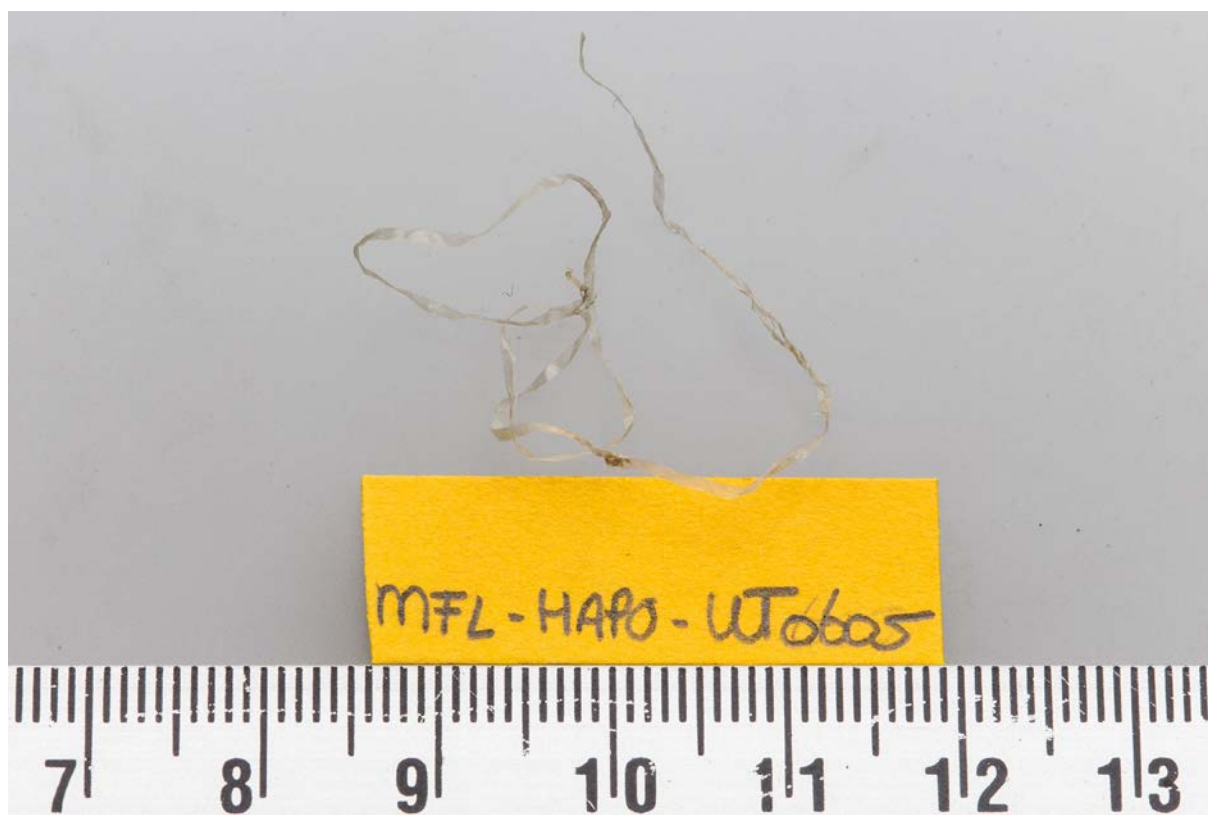

Thread PE (90%) Mass 0.0032 g

MFL-HAPO-UT0617

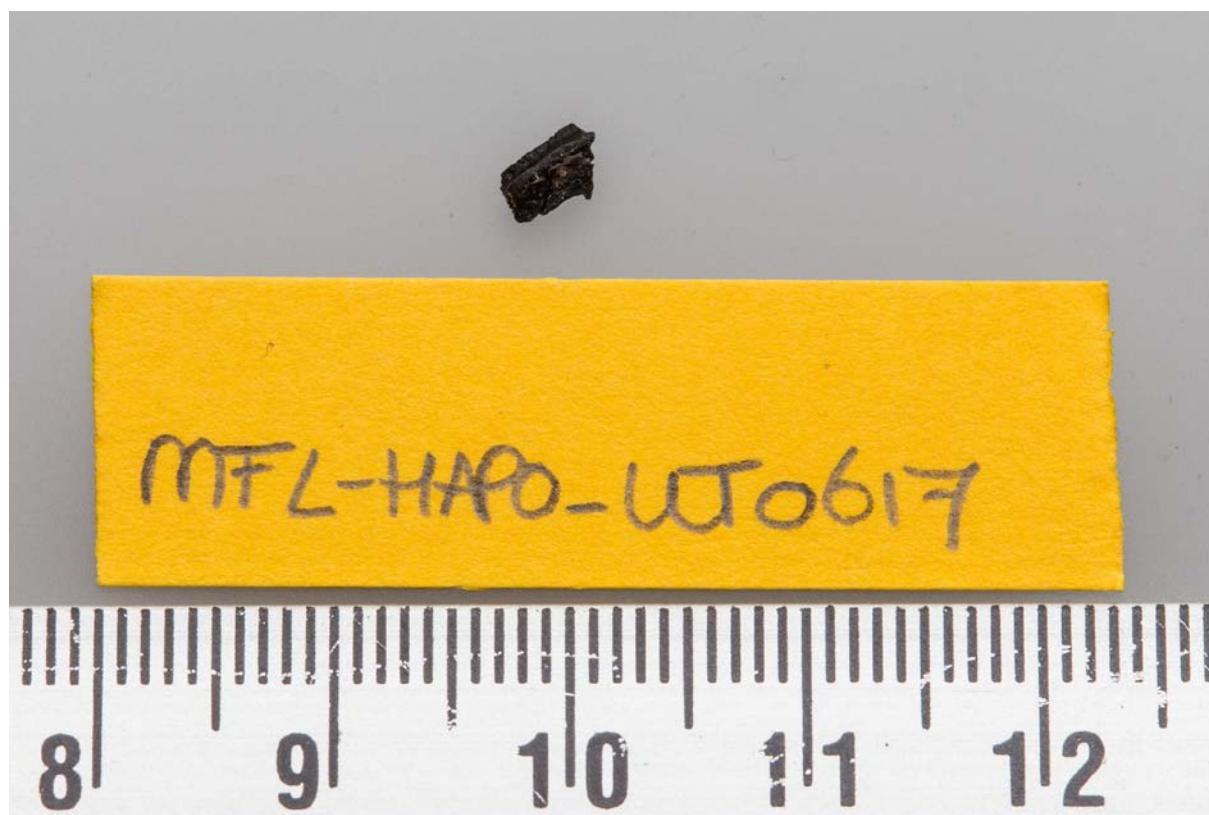

Fragment No ID (PA 71%) Mass 0.0111 g

MFL-HAPO-UT0674

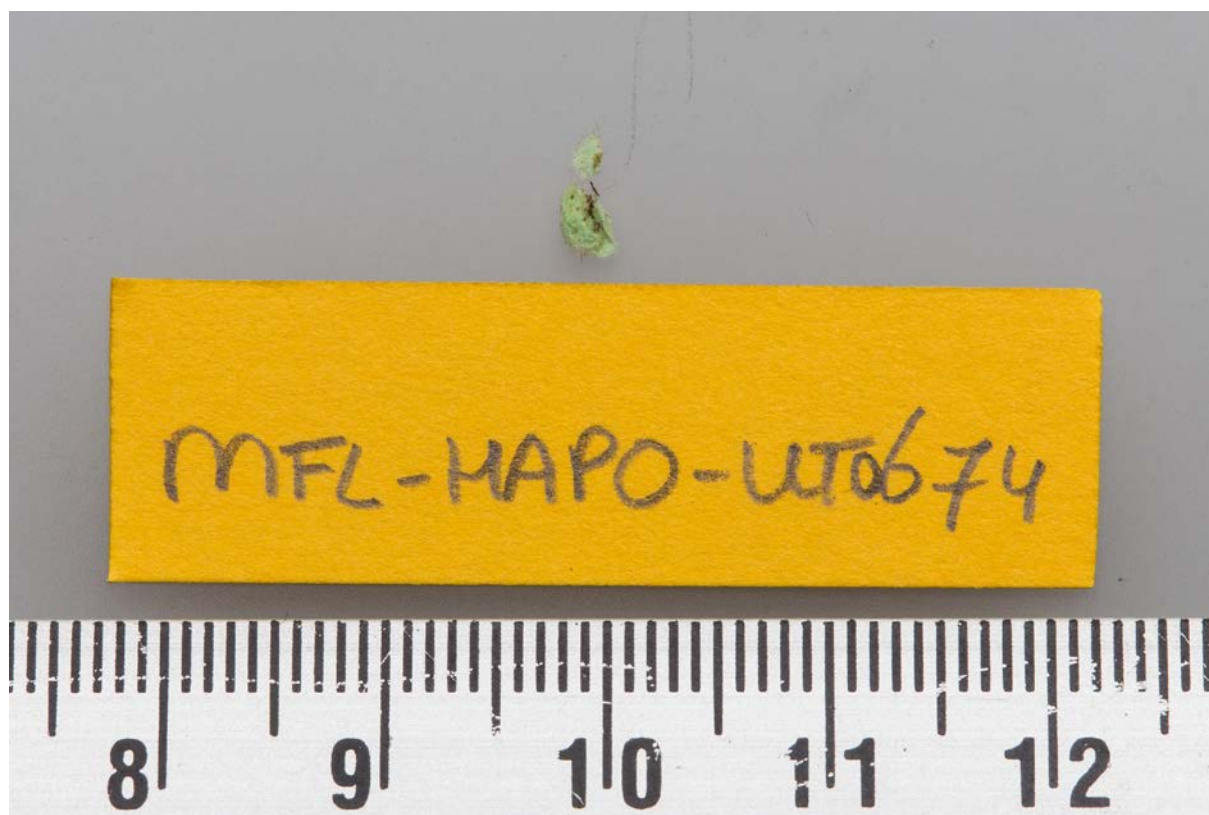

Rubbish: Paper (PI 23%), no plastics present Mass 0.0001 g

**MFL-HAPO-UT0687**

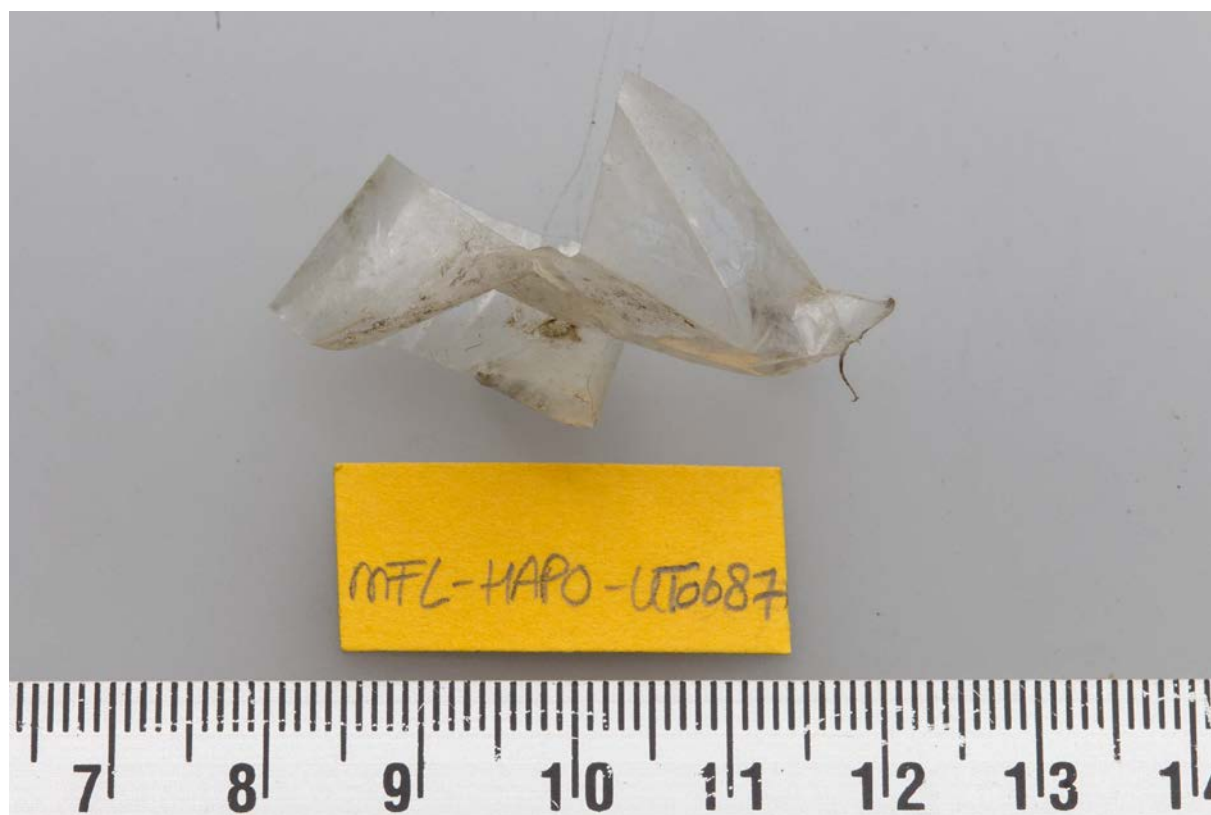

**Sheet PP (93%) Mass 0.0396 g**

MFL-HAPO-UT0714

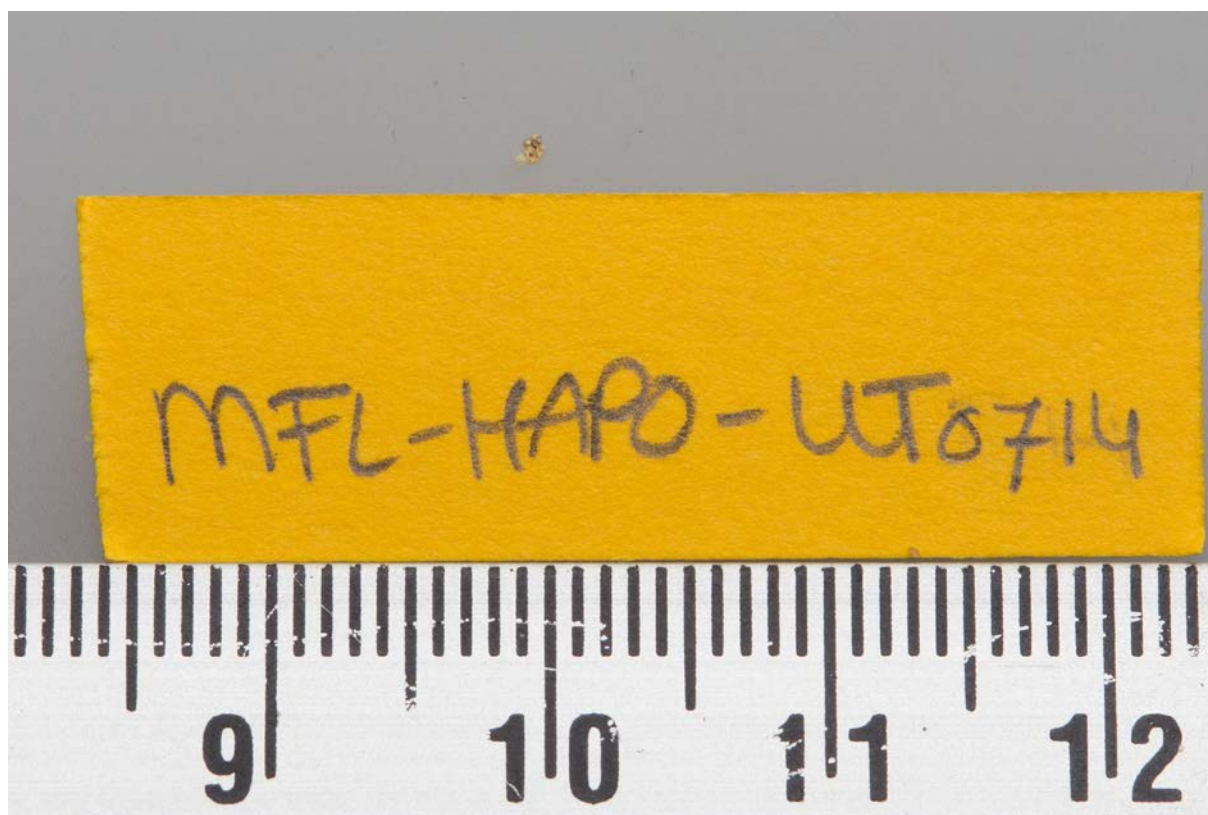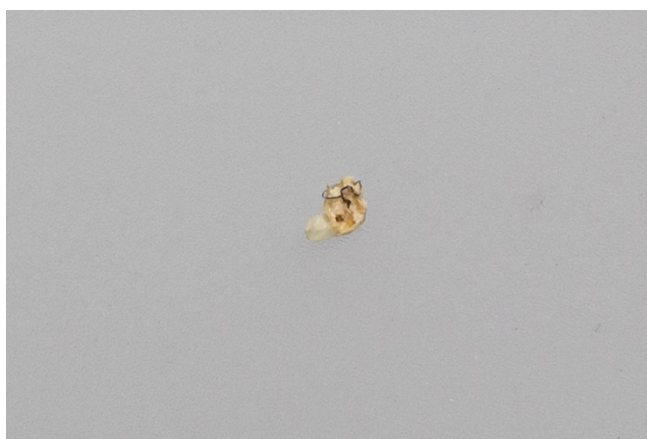

No plastic detected during the diet overflow procedure; this item found in the sieved remains.

Foam No ID (PA 60%) Mass 0.0001 g



**MFL-HAPO-UT0799**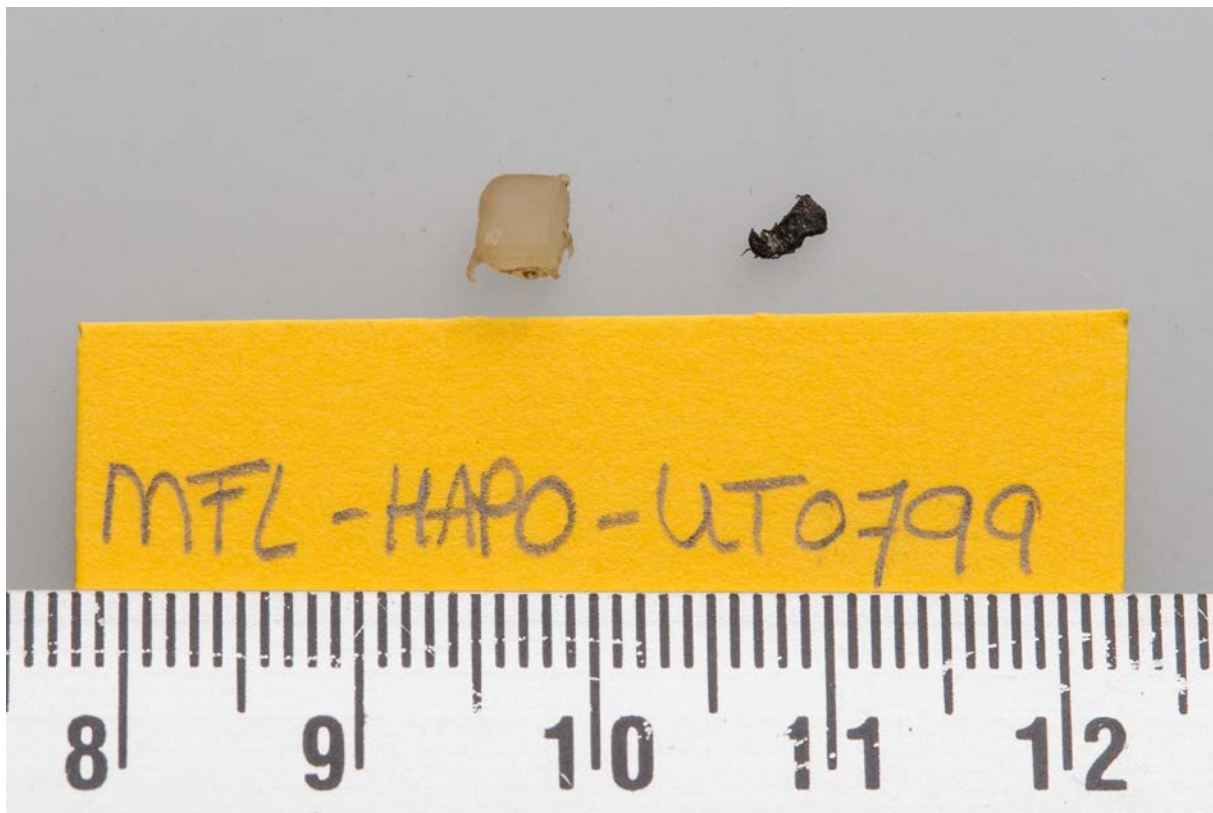

No plastics detected during the diet overflow procedure;  
these items found in the sieved remains.

Industrial Pellet (left) PE (99%) Mass 0.0328 g;

Fragment (right) No ID (PS 31%) Mass 0.0016 g

MFL-HAPO-UT0867

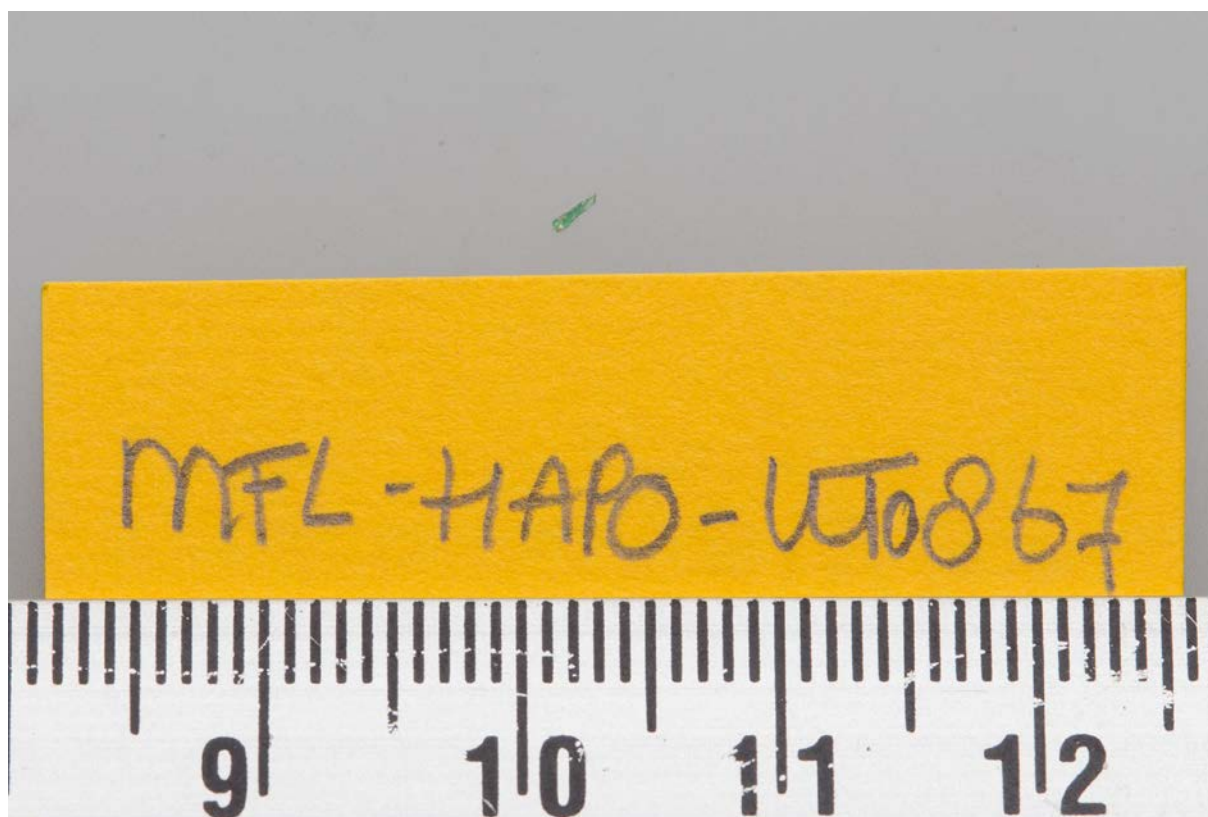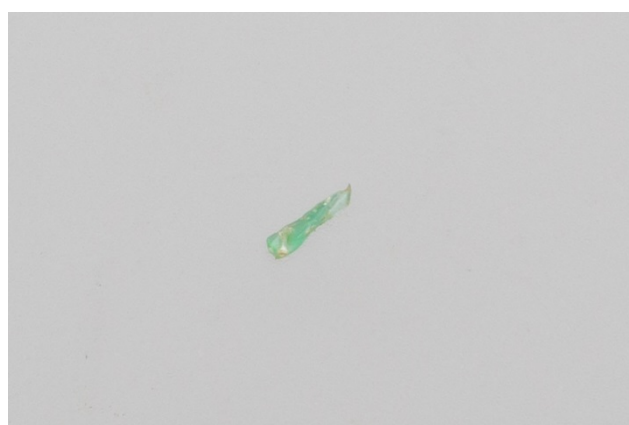

Fragment PE (92%) Mass 0.0001 g

**MFL-HAPO-UT0932**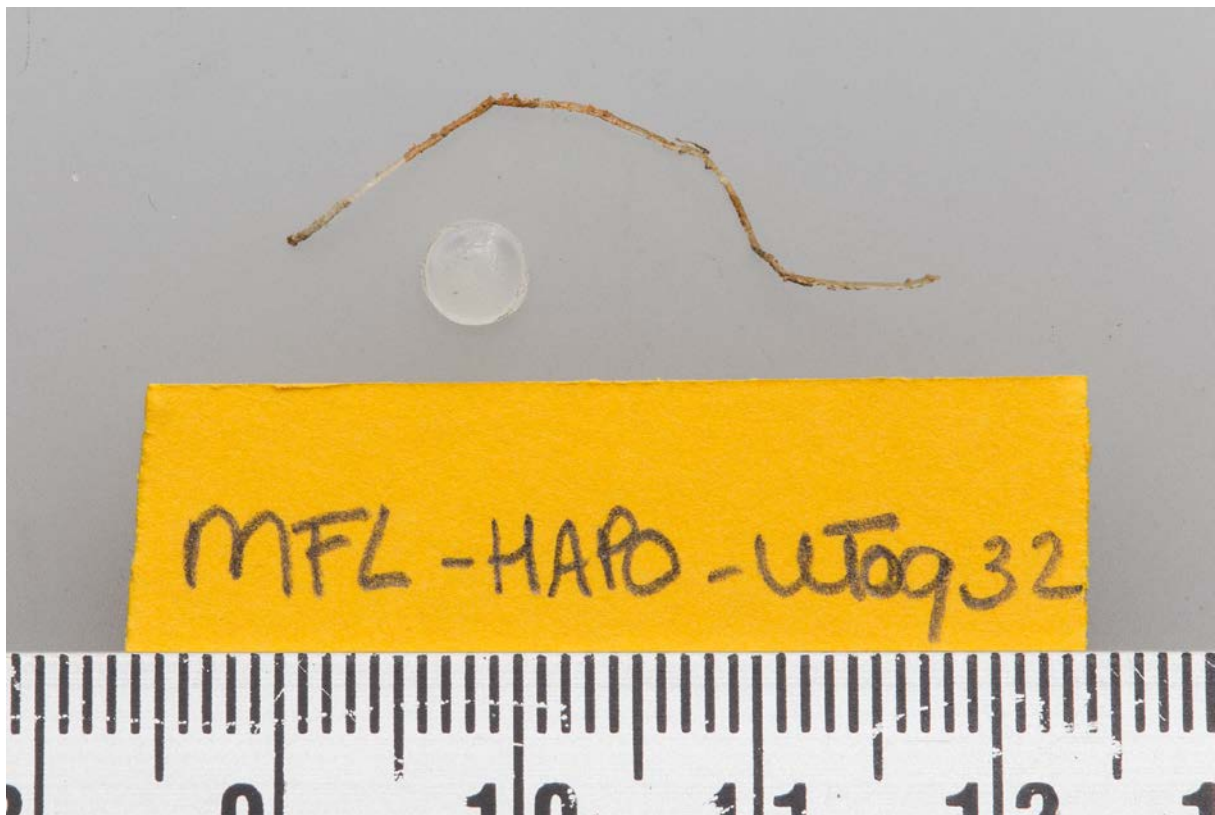

No plastics detected during the diet overflow procedure;  
these items were found in the sieved remains.

Thread (top) No ID (POM 69%) Mass 0.0024 g;

Industrial Pellet (Bottom) PE (97%) Mass 0.0131 g

MFL-HAPO-UT0945

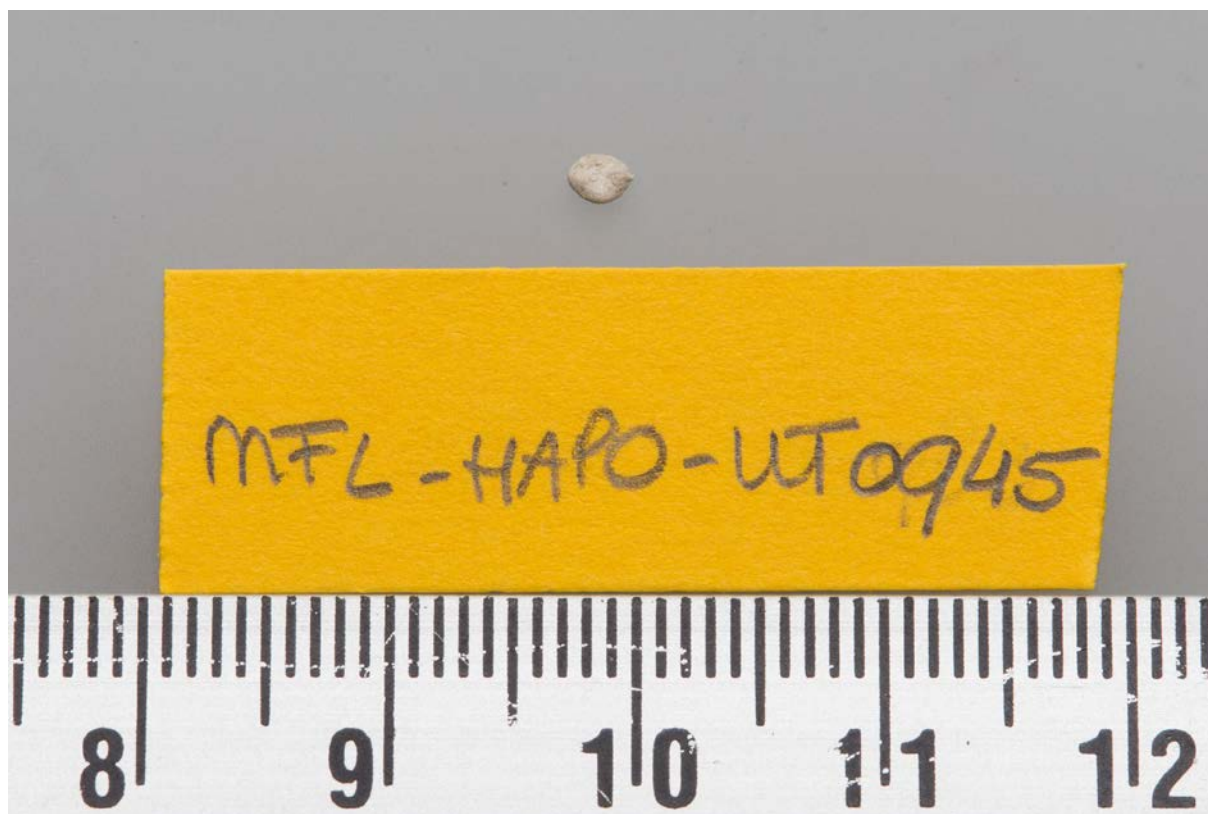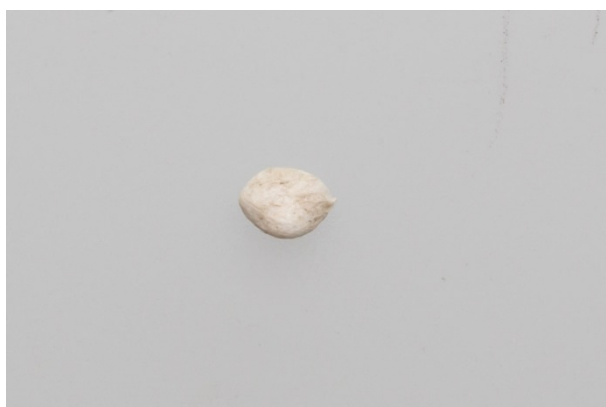

No plastic detected during the diet overflow procedure; this item found in the sieved remains.

Foam No ID (PS 74%) Mass 0.0006g

MFL-HAPO-UT0974

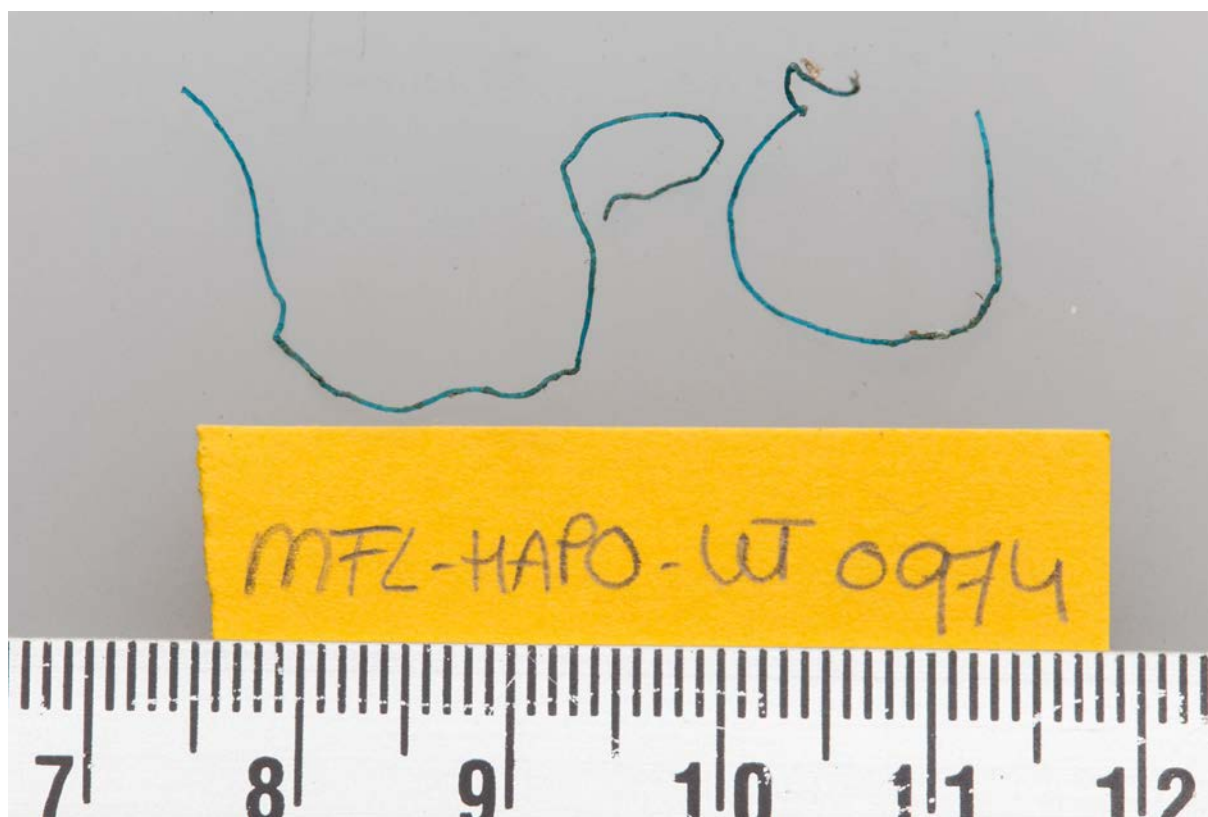

Left thread No ID (PI 48%) Mass 0.0030 g;

right thread No ID (PMMA 51%) Mass 0.0020 g



MFL-HAPO-UT0983

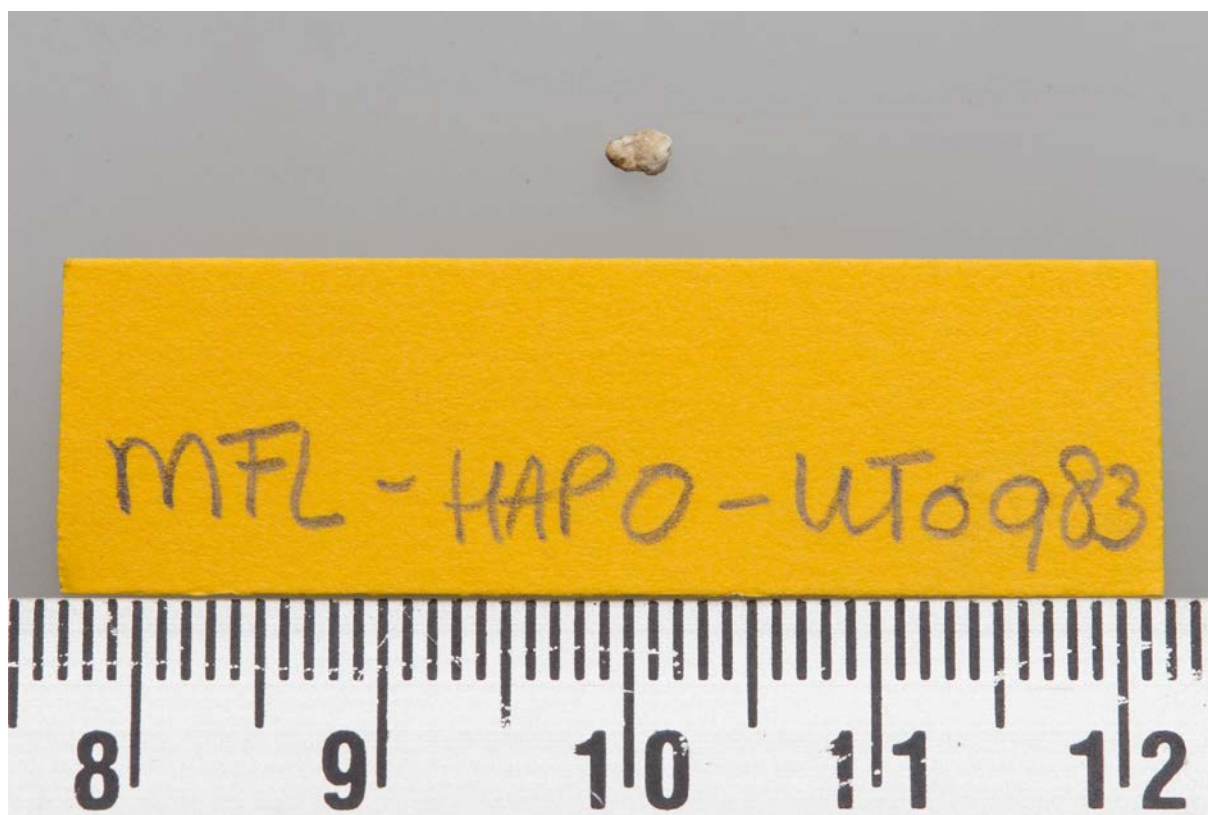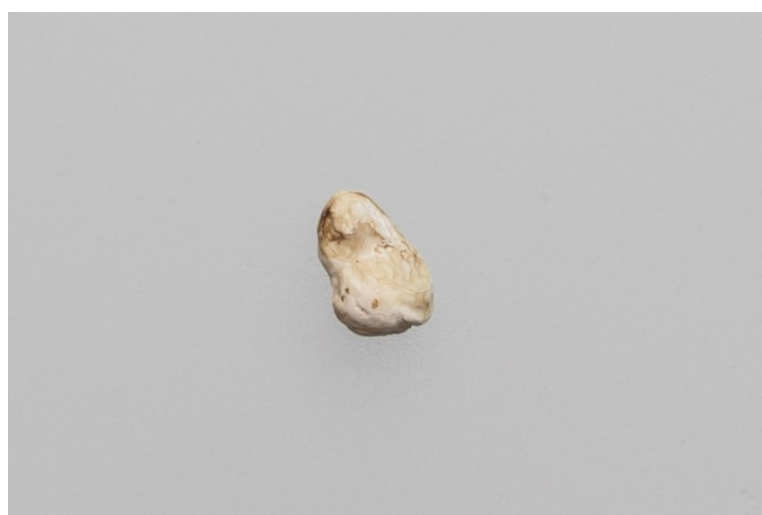

No plastic detected during the diet overflow procedure; this item found in the sieved remains.

Fragment No ID (PC 51%) Mass 0.0031 g
